# Supplementary material
Source: publisher figshare collection journal article supplement (https://gsajournals.figshare.com/articles/dataset/_/19089992)

An interolog-based barley interactome as an integration framework for NLR immune signaling.

Valeria Velásquez-Zapata, J. Mitch Elmore, Greg Fuerst, Roger P. Wise

**S2 Figure. Time-course expression patterns of DM DE genes by type of response.**

CI 16151 (*Mla6*, *Bln1*, *Sgt1*) in black and *m1a6*-m18982 (*m1a6*, *Bln1*, *Sgt1*) in red, significant differences (adjusted p-values <0.001) are designated by an asterisk.

**CORE Set**

Gene IDs, descriptions, and classification are shown in S3 Data.

HORVU.MOREX.r2.3HG0261450

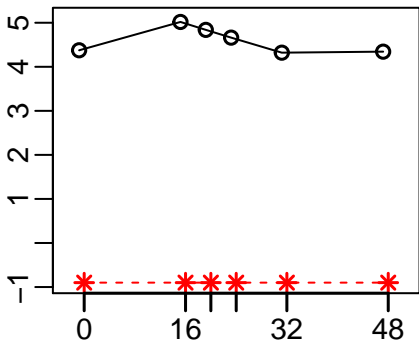

# HORVU.MOREX.r2.5HG0357890

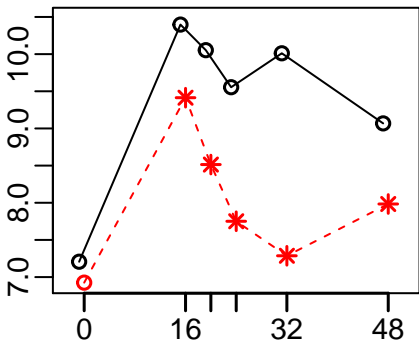

# HORVU.MOREX.r2.6HG0451800

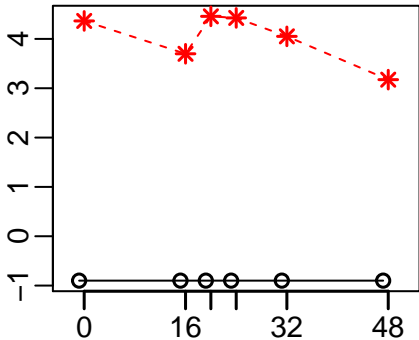

HORVU.MOREX.r2.7HG0547730

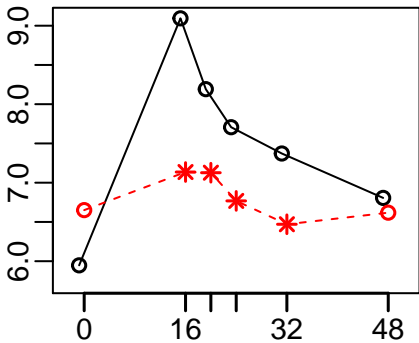

# HORVU.MOREX.r2.7HG0615950

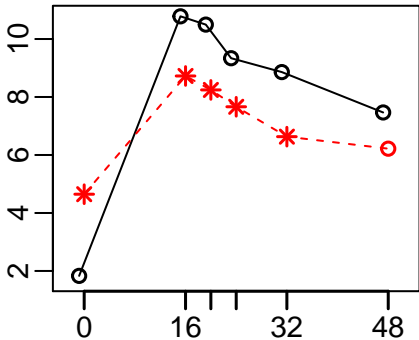

# HORVU.MOREX.r2.7HG0617050

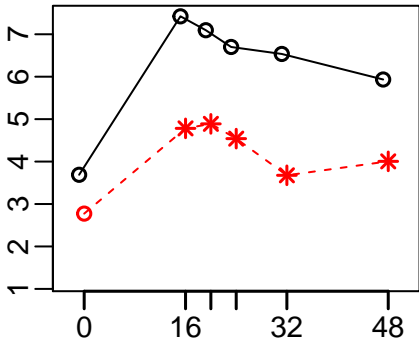

# HORVU.MOREX.r2.7HG0623060

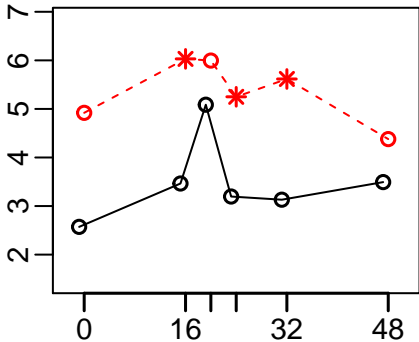



An interolog-based barley interactome as an integration framework for NLR immune signaling.

Valeria Velásquez-Zapata, J. Mitch Elmore, Greg Fuerst, Roger P. Wise

**S2 Figure. Time-course expression patterns of DM DE genes by type of response.**

CI 16151 (*Mla6*, *Bln1*, *Sgt1*) in black and *m1a6*-m18982 (*m1a6*, *Bln1*, *Sgt1*) in red, significant differences (adjusted p-values <0.001) are designated by an asterisk.

**UNIQUE 16 HAI Set**

Gene IDs, descriptions, and classification are shown in S3 Data.

# HORVU.MOREX.r2.1HG0000740

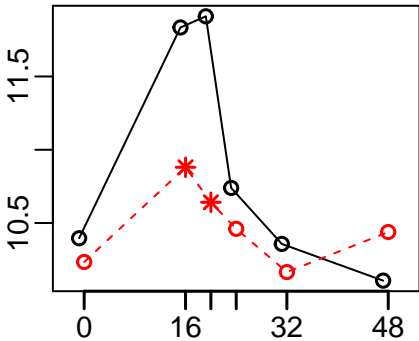

# HORVU.MOREX.r2.1HG0006350

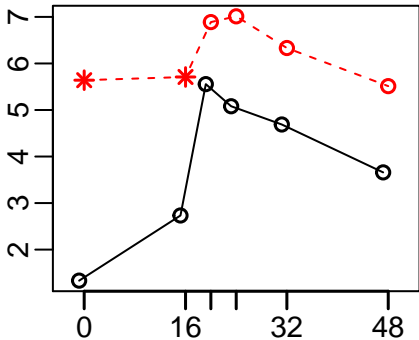

# HORVU.MOREX.r2.1HG0071870

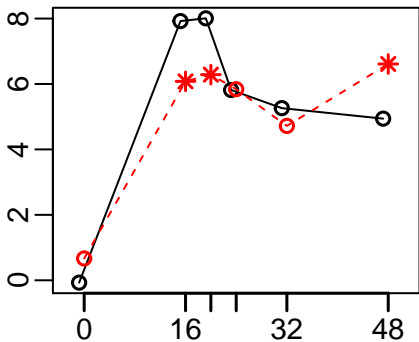

# HORVU.MOREX.r2.2HG0083720

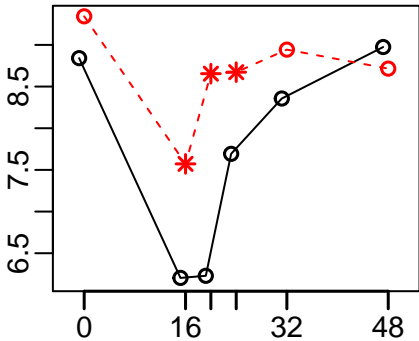

HORVU.MOREX.r2.2HG0086780

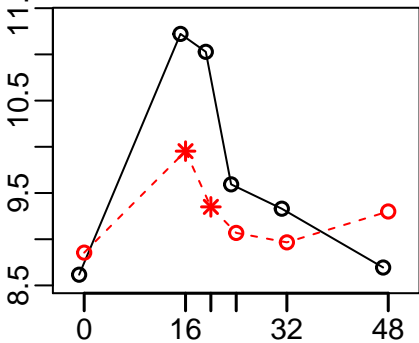

HORVU.MOREX.r2.2HG0110730

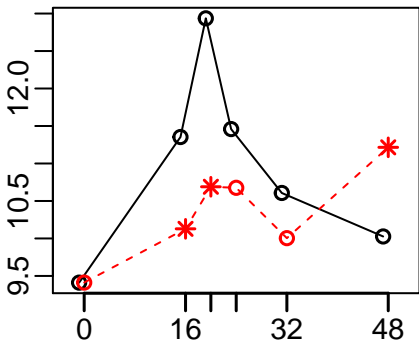

HORVU.MOREX.r2.2HG0137960

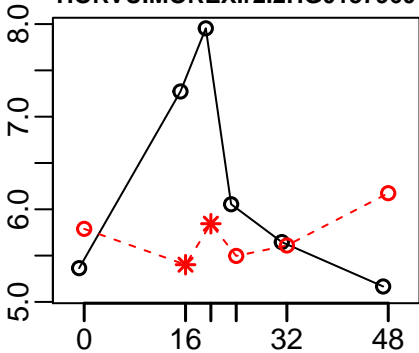



# HORVU.MOREX.r2.2HG0177320

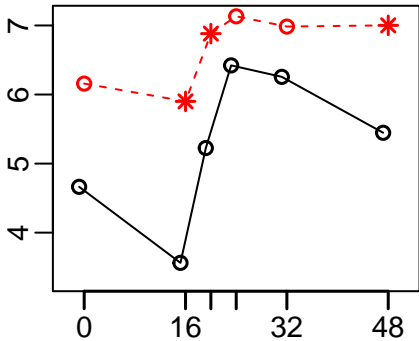

HORVU.MOREX.r2.3HG0196440

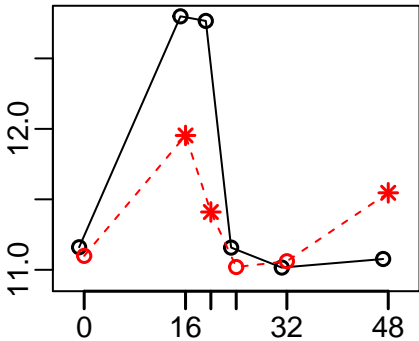

HORVU.MOREX.r2.3HG0221260

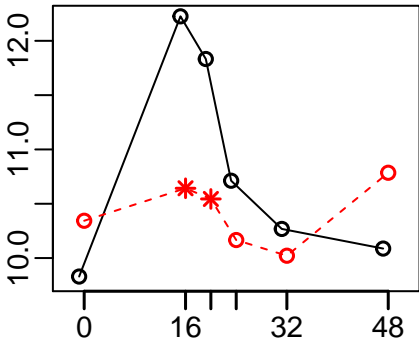

# HORVU.MOREX.r2.3HG0265320

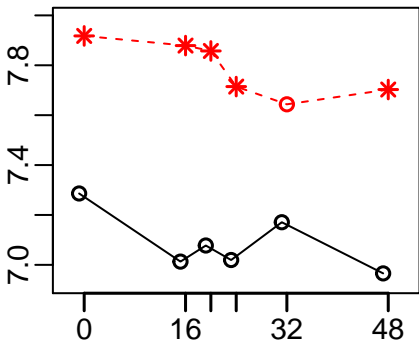

HORVU.MOREX.r2.4HG0341190

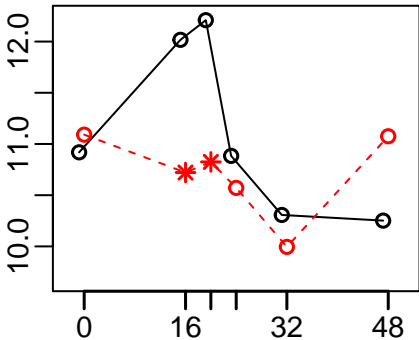

HORVU.MOREX.r2.5HG0353220

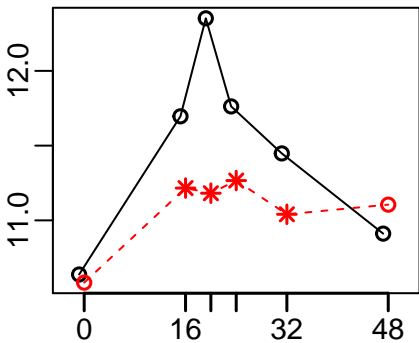

# HORVU.MOREX.r2.5HG0358060

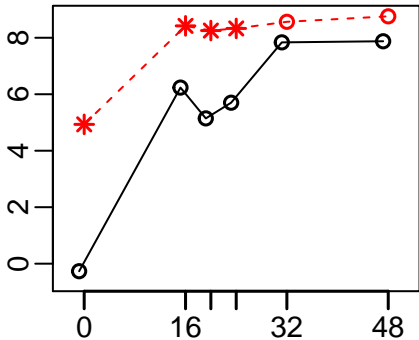

HORVU.MOREX.r2.5HG0364830

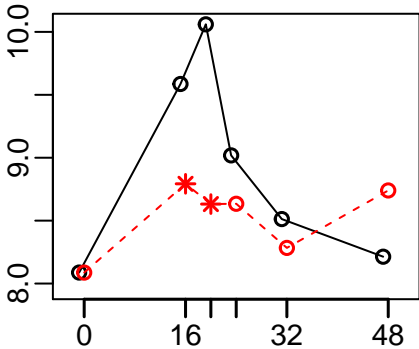



HORVU.MOREX.r2.5HG0368610

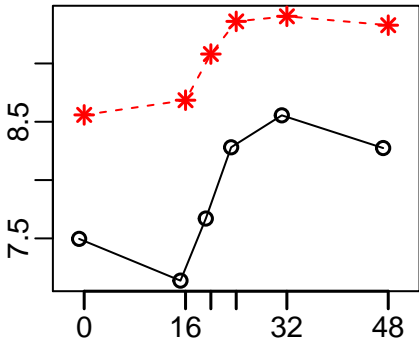

HORVU.MOREX.r2.5HG0375640

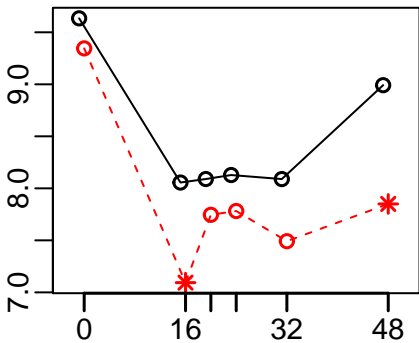

HORVU.MOREX.r2.5HG0414970

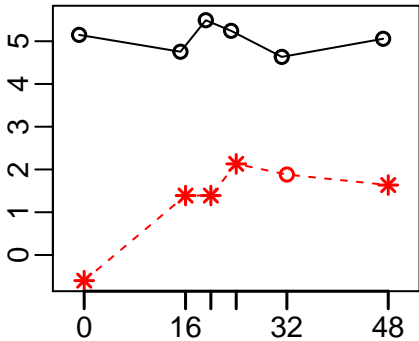

# HORVU.MOREX.r2.5HG0419720

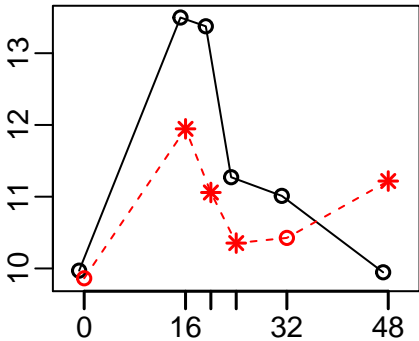

# HORVU.MOREX.r2.5HG0422890

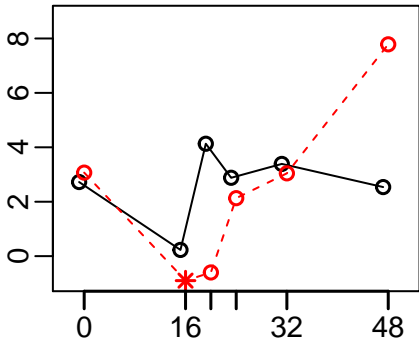

HORVU.MOREX.r2.6HG0454780

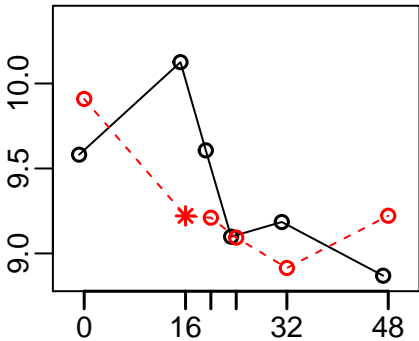

# HORVU.MOREX.r2.6HG0471210

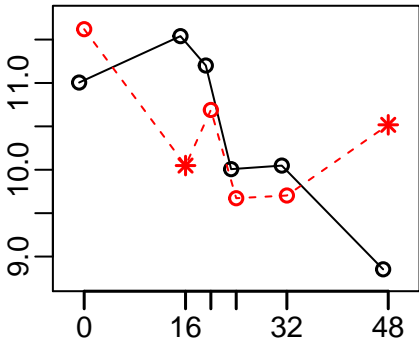

# HORVU.MOREX.r2.6HG0496940

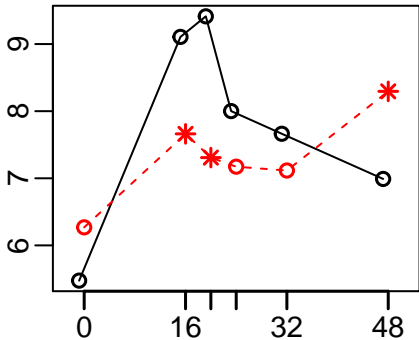



# HORVU.MOREX.r2.6HG0500330

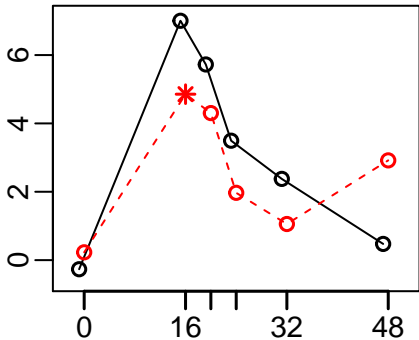

HORVU.MOREX.r2.6HG0510100

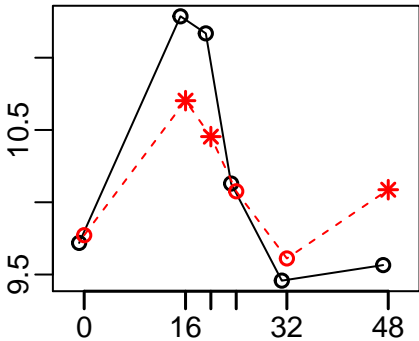

# HORVU.MOREX.r2.6HG0515710

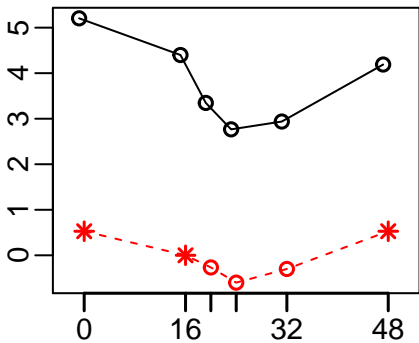

HORVU.MOREX.r2.7HG0540760

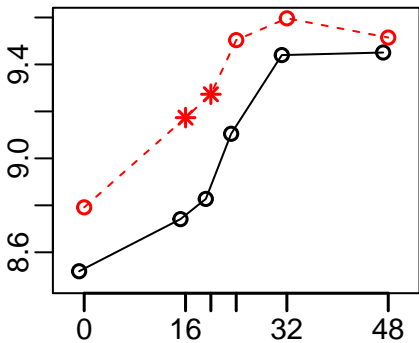

HORVU.MOREX.r2.7HG0547700

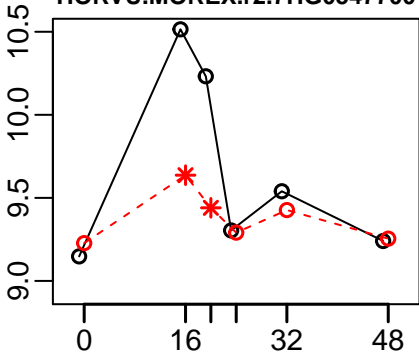

HORVU.MOREX.r2.7HG0562220

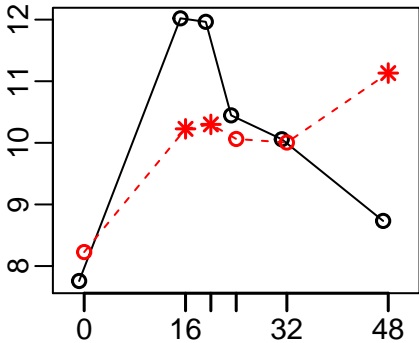

# HORVU.MOREX.r2.7HG0616250

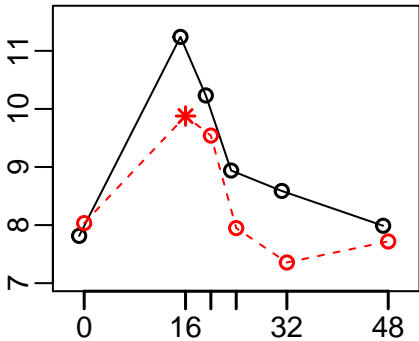

An interolog-based barley interactome as an integration framework for NLR immune signaling.

Valeria Velásquez-Zapata, J. Mitch Elmore, Greg Fuerst, Roger P. Wise

**S2 Figure. Time-course expression patterns of DM DE genes by type of response.**

CI 16151 (*Mla6*, *Bln1*, *Sgt1*) in black and *m1a6*-m18982 (*m1a6*, *Bln1*, *Sgt1*) in red, significant differences (adjusted p-values <0.001) are designated by an asterisk.

**UNIQUE 32 HAI Set**

Gene IDs, descriptions, and classification are shown in S3 Data.



# HORVU.MOREX.r2.1HG0019760

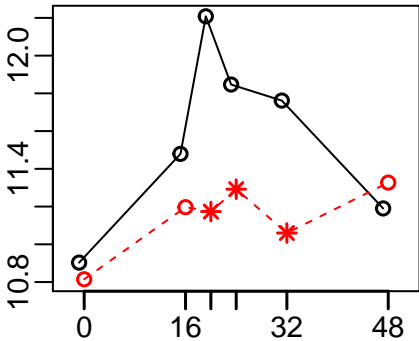

# HORVU.MOREX.r2.1HG0067490

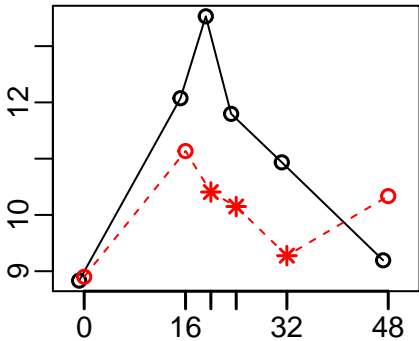

# HORVU.MOREX.r2.1HG0068430

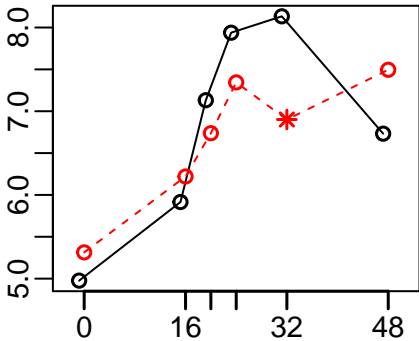

# HORVU.MOREX.r2.1HG0073890

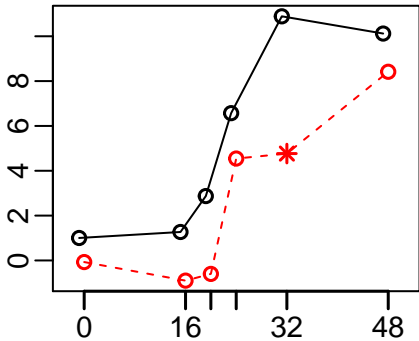

# HORVU.MOREX.r2.1HG0073960

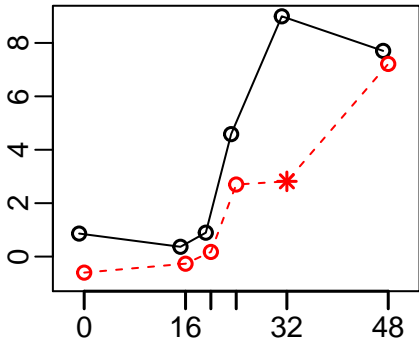

# HORVU.MOREX.r2.2HG0088020

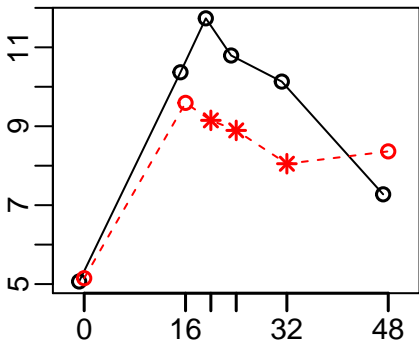

HORVU.MOREX.r2.2HG0088730

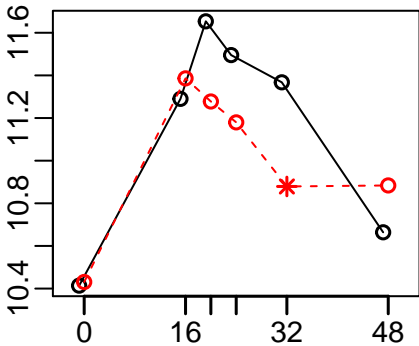

# HORVU.MOREX.r2.2HG0090250

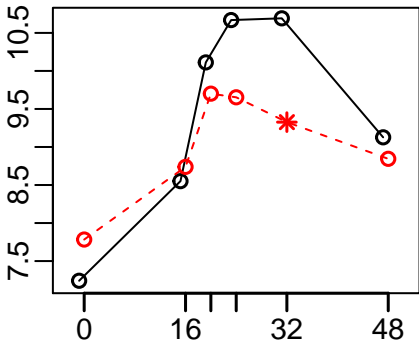



# HORVU.MOREX.r2.2HG0102880

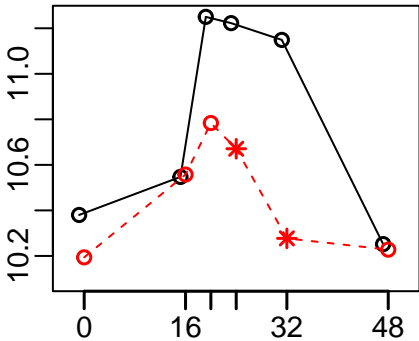

# HORVU.MOREX.r2.2HG0129090

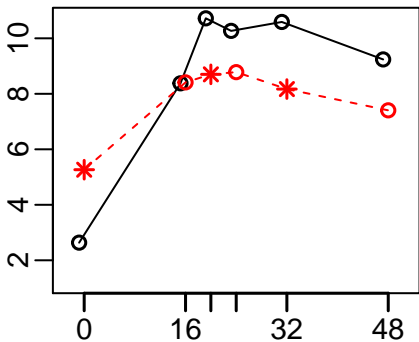

# HORVU.MOREX.r2.2HG0140830

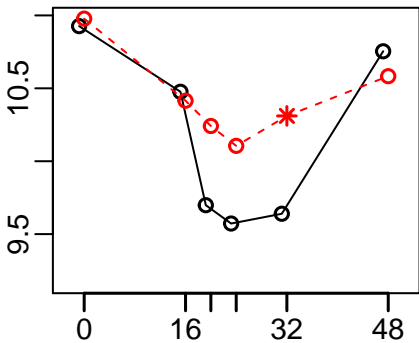

HORVU.MOREX.r2.2HG0142760

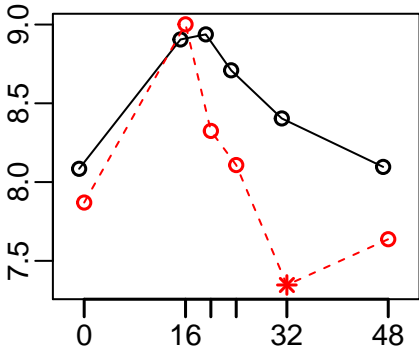

# HORVU.MOREX.r2.2HG0147250

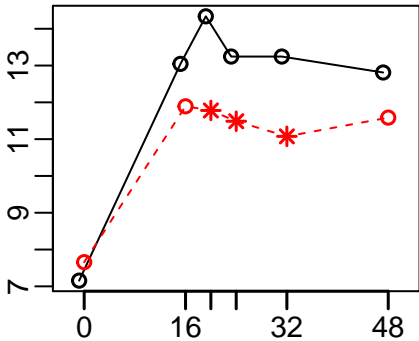

# HORVU.MOREX.r2.2HG0161390

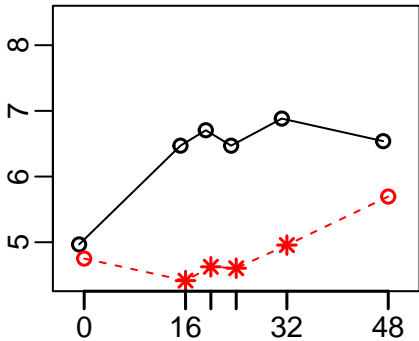

# HORVU.MOREX.r2.2HG0166780

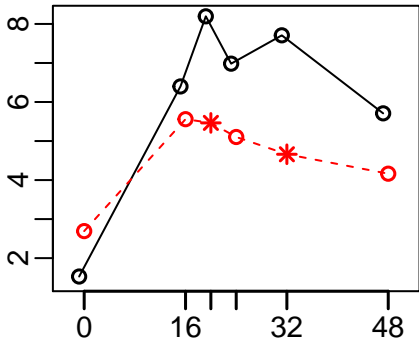

HORVU.MOREX.r2.2HG0167330

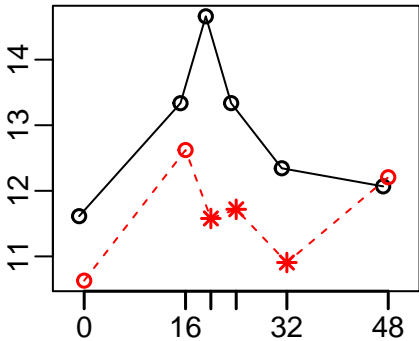



HORVU.MOREX.r2.2HG0169770

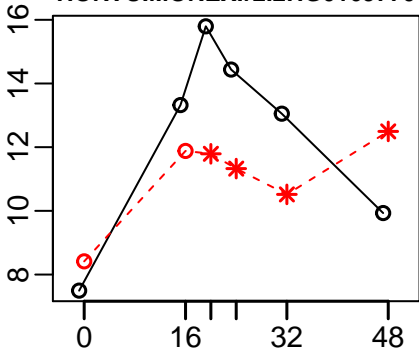

# HORVU.MOREX.r2.2HG0180900

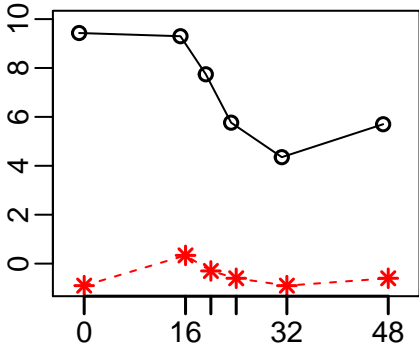

HORVU.MOREX.r2.3HG0194060

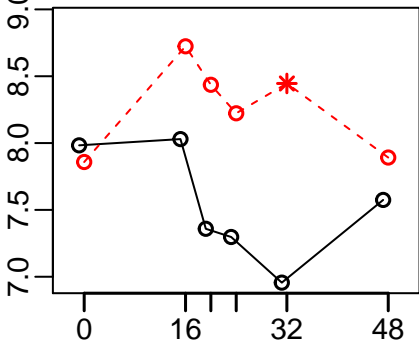

HORVU.MOREX.r2.3HG0199680

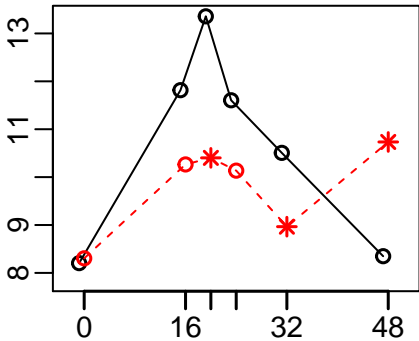

HORVU.MOREX.r2.3HG0202100

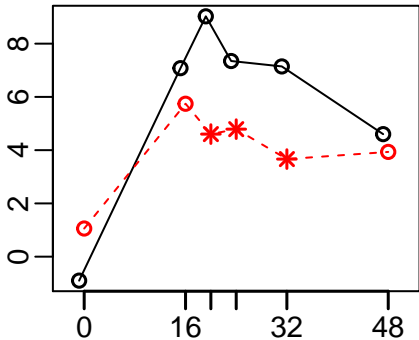

# HORVU.MOREX.r2.3HG0202130

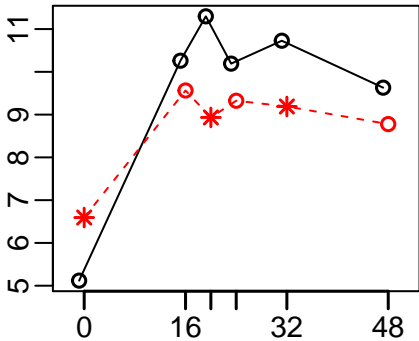

HORVU.MOREX.r2.3HG0221130

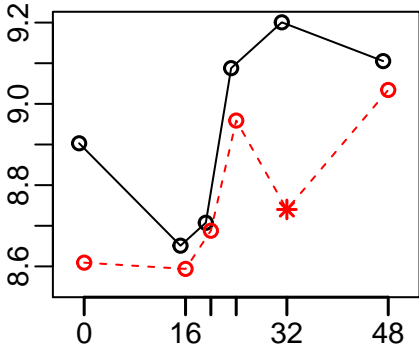

HORVU.MOREX.r2.3HG0233570

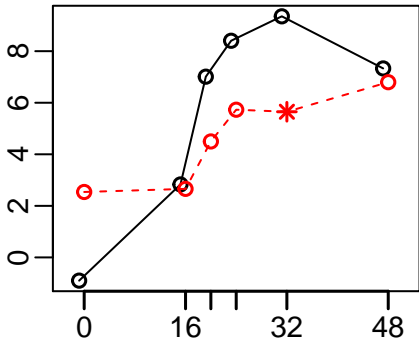



# HORVU.MOREX.r2.3HG0238770

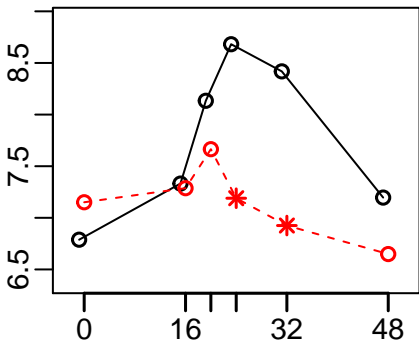

HORVU.MOREX.r2.3HG0254340

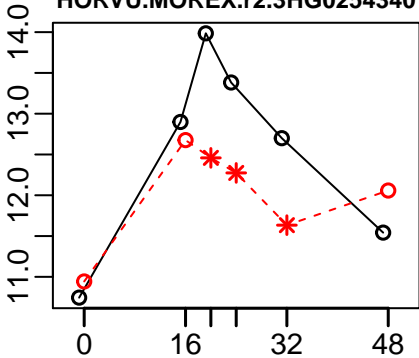

# HORVU.MOREX.r2.3HG0260920

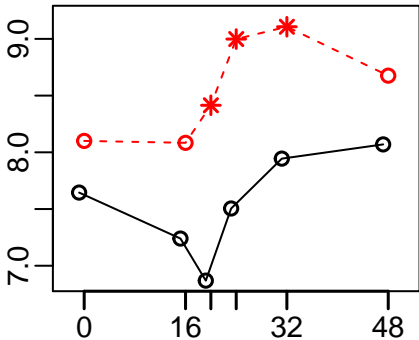

# HORVU.MOREX.r2.3HG0262620

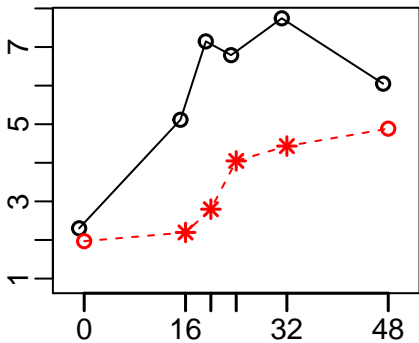

# HORVU.MOREX.r2.3HG0266890

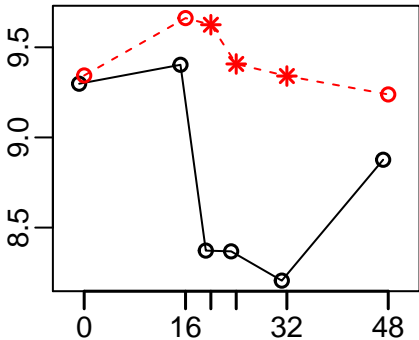

HORVU.MOREX.r2.3HG0269660

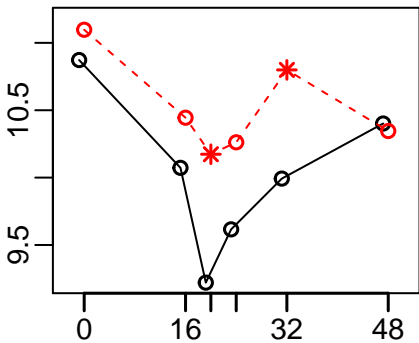

HORVU.MOREX.r2.3HG0270820

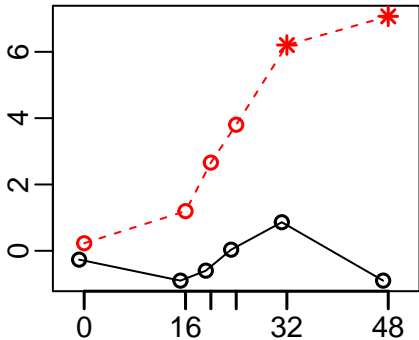

HORVU.MOREX.r2.4HG0324220

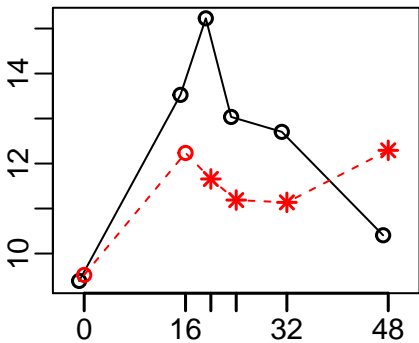



HORVU.MOREX.r2.4HG0334150

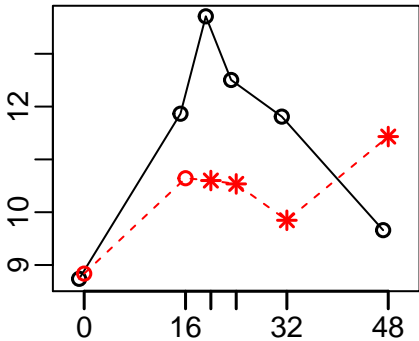

# HORVU.MOREX.r2.4HG0336500

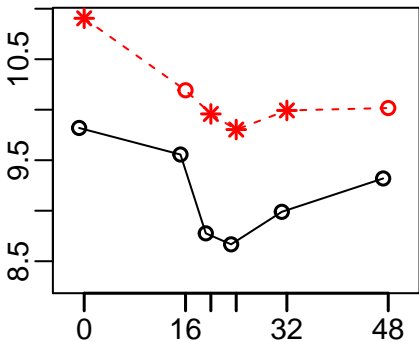

# HORVU.MOREX.r2.4HG0338770

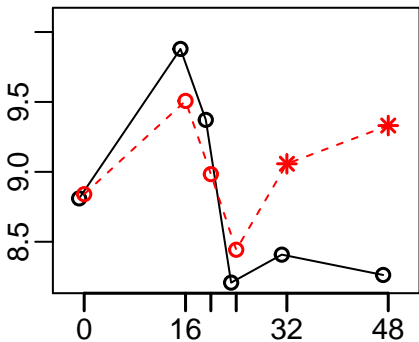

# HORVU.MOREX.r2.4HG0338920

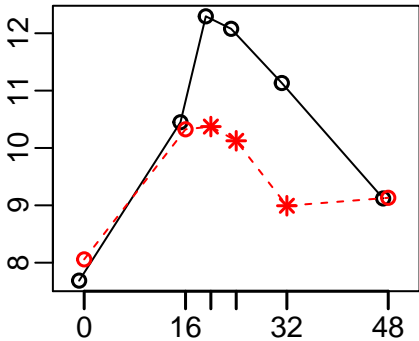

# HORVU.MOREX.r2.4HG0339550

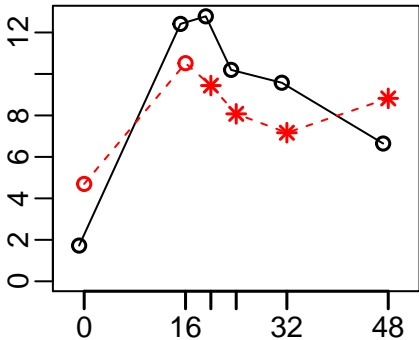

HORVU.MOREX.r2.4HG0341130

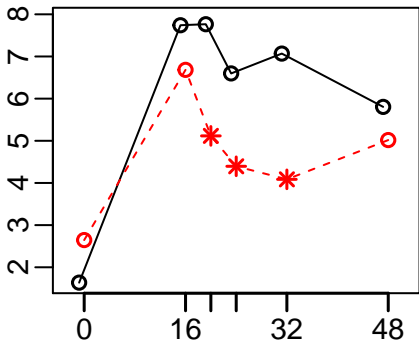

HORVU.MOREX.r2.4HG0342490

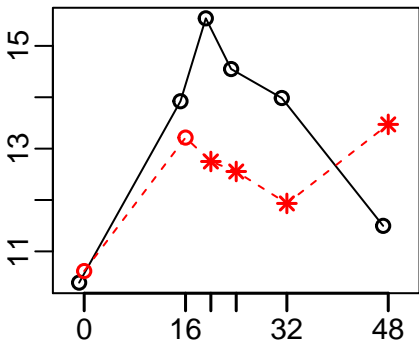

# HORVU.MOREX.r2.5HG0352570

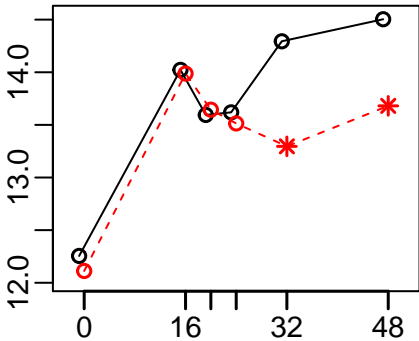



HORVU.MOREX.r2.5HG0389190

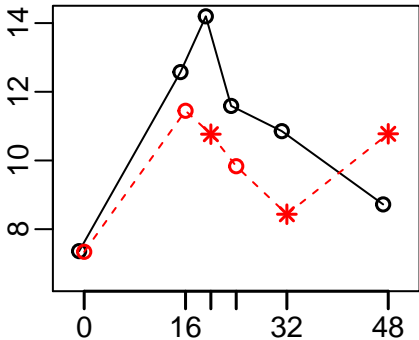

HORVU.MOREX.r2.5HG0391760

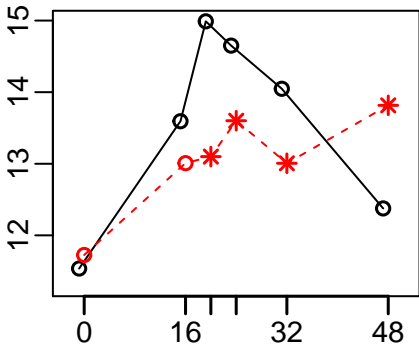

# HORVU.MOREX.r2.5HG0397720

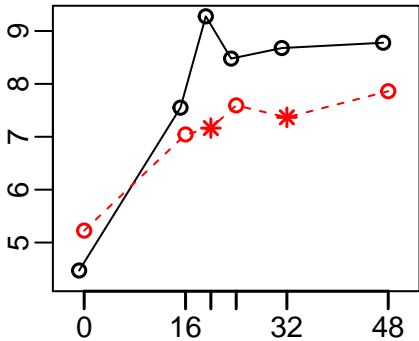

HORVU.MOREX.r2.5HG0406700

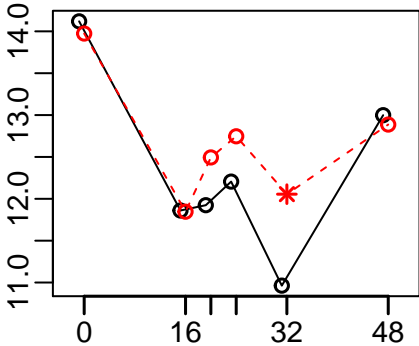

# HORVU.MOREX.r2.5HG0413940

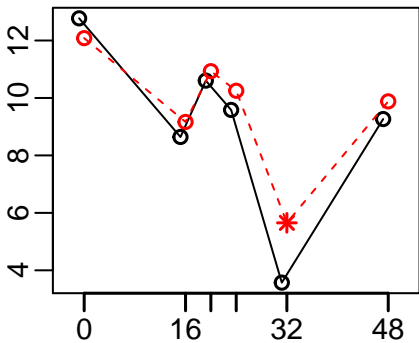

HORVU.MOREX.r2.5HG0414290

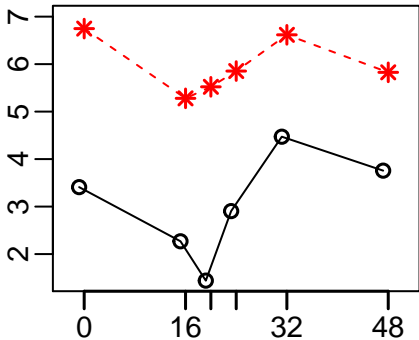

HORVU.MOREX.r2.5HG0415550

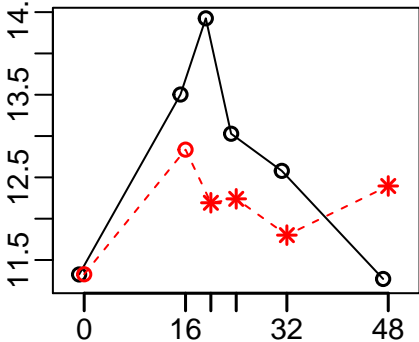

# HORVU.MOREX.r2.5HG0418360

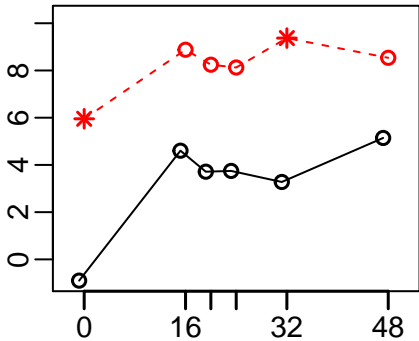



# HORVU.MOREX.r2.6HG0450400

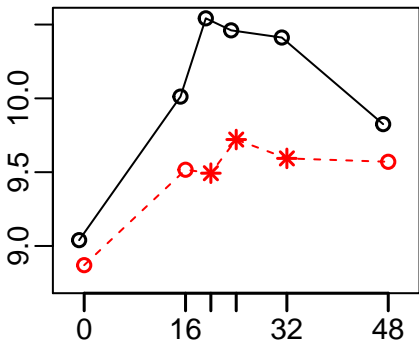

HORVU.MOREX.r2.6HG0450620

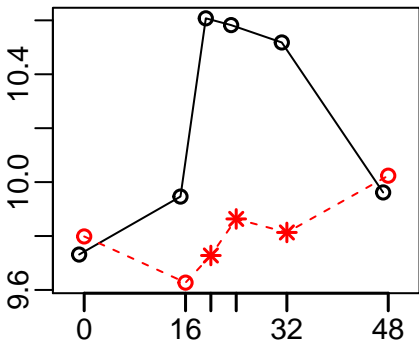

HORVU.MOREX.r2.6HG0461610

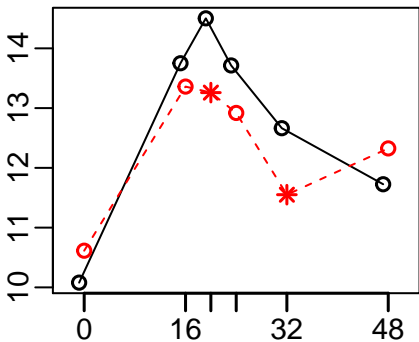

HORVU.MOREX.r2.6HG0474240

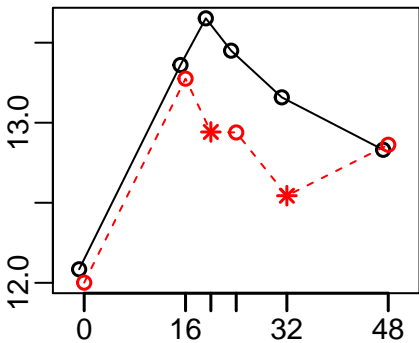

HORVU.MOREX.r2.6HG0498710

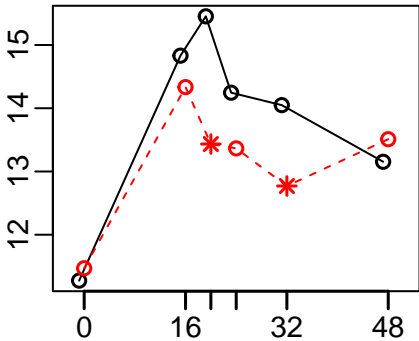

HORVU.MOREX.r2.6HG0498830

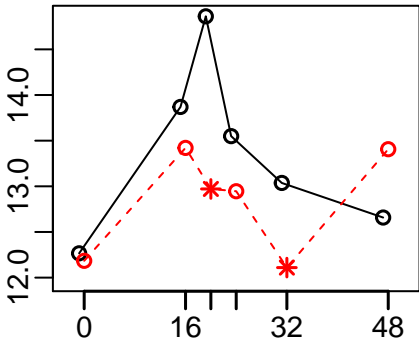

HORVU.MOREX.r2.6HG0501260

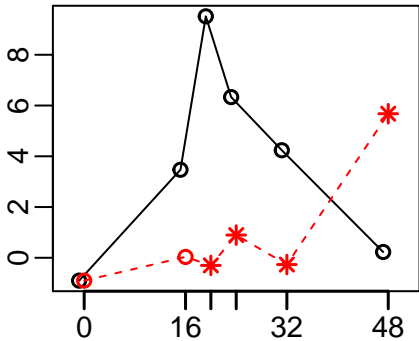

# HORVU.MOREX.r2.6HG0514200

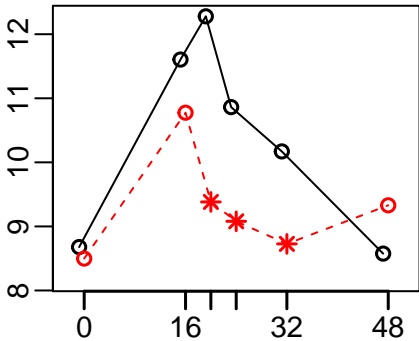



# HORVU.MOREX.r2.6HG0515910

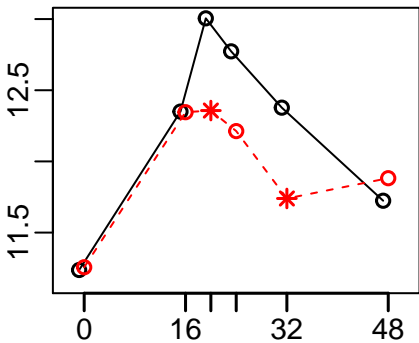

HORVU.MOREX.r2.6HG0516400

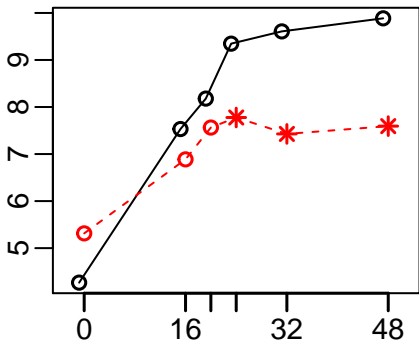

# HORVU.MOREX.r2.6HG0516930

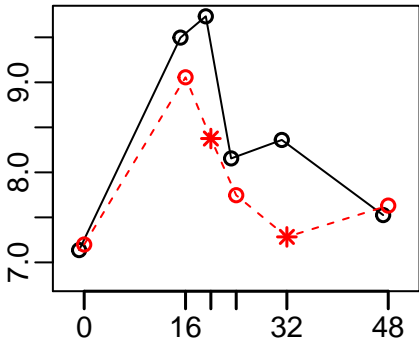

HORVU.MOREX.r2.7HG0529200

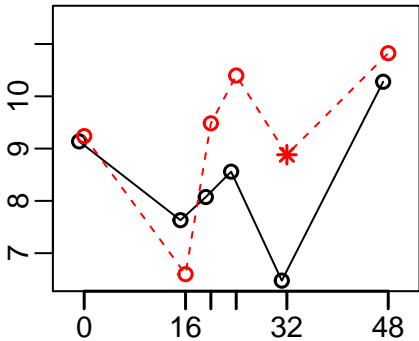

# HORVU.MOREX.r2.7HG0535070

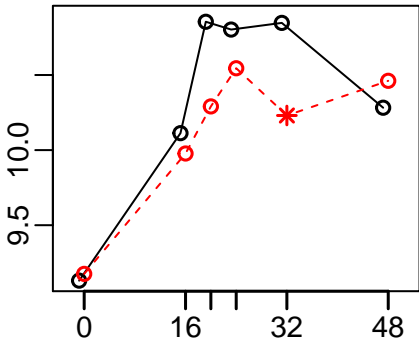

HORVU.MOREX.r2.7HG0535730

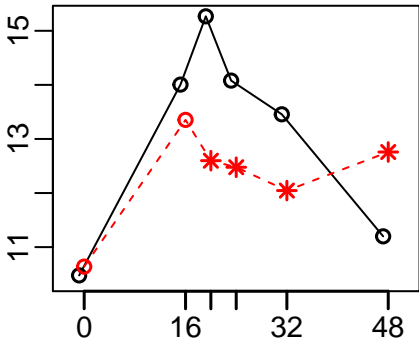

HORVU.MOREX.r2.7HG0541070

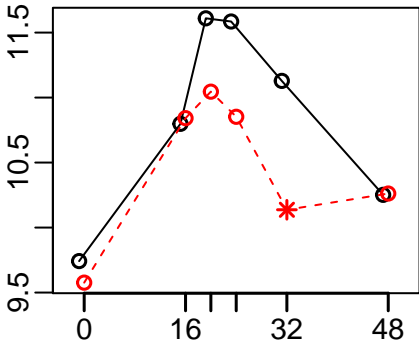

HORVU.MOREX.r2.7HG0554840

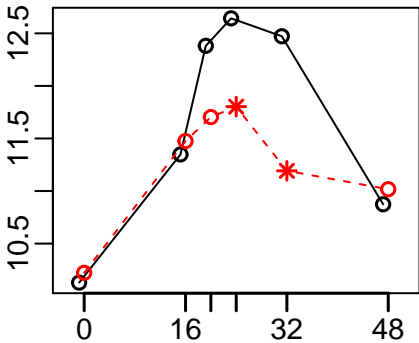



# HORVU.MOREX.r2.7HG0555260

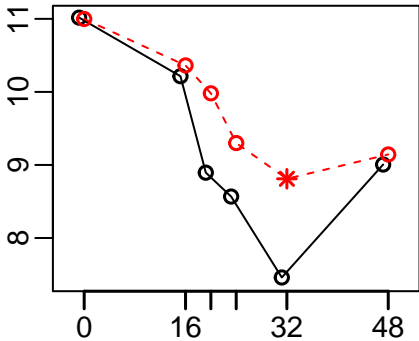

# HORVU.MOREX.r2.7HG0576290

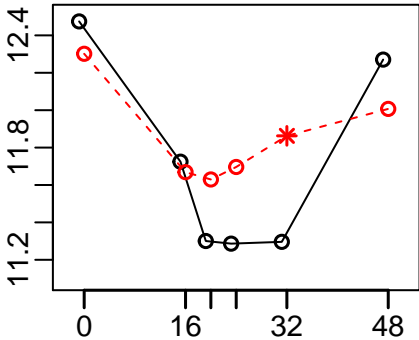

# HORVU.MOREX.r2.7HG0582550

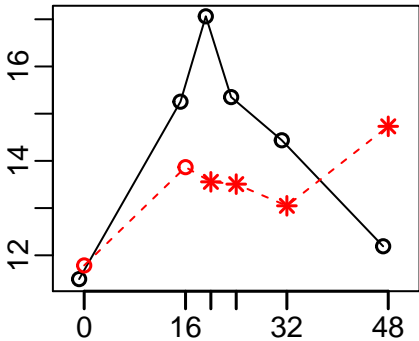

Supplement: Supplementary file 1 [file 1]
