# Supplementary material
Source: publisher figshare collection journal article supplement (https://gsajournals.figshare.com/articles/dataset/_/19089992)
Supplement: Supplementary file 2 [file 1]

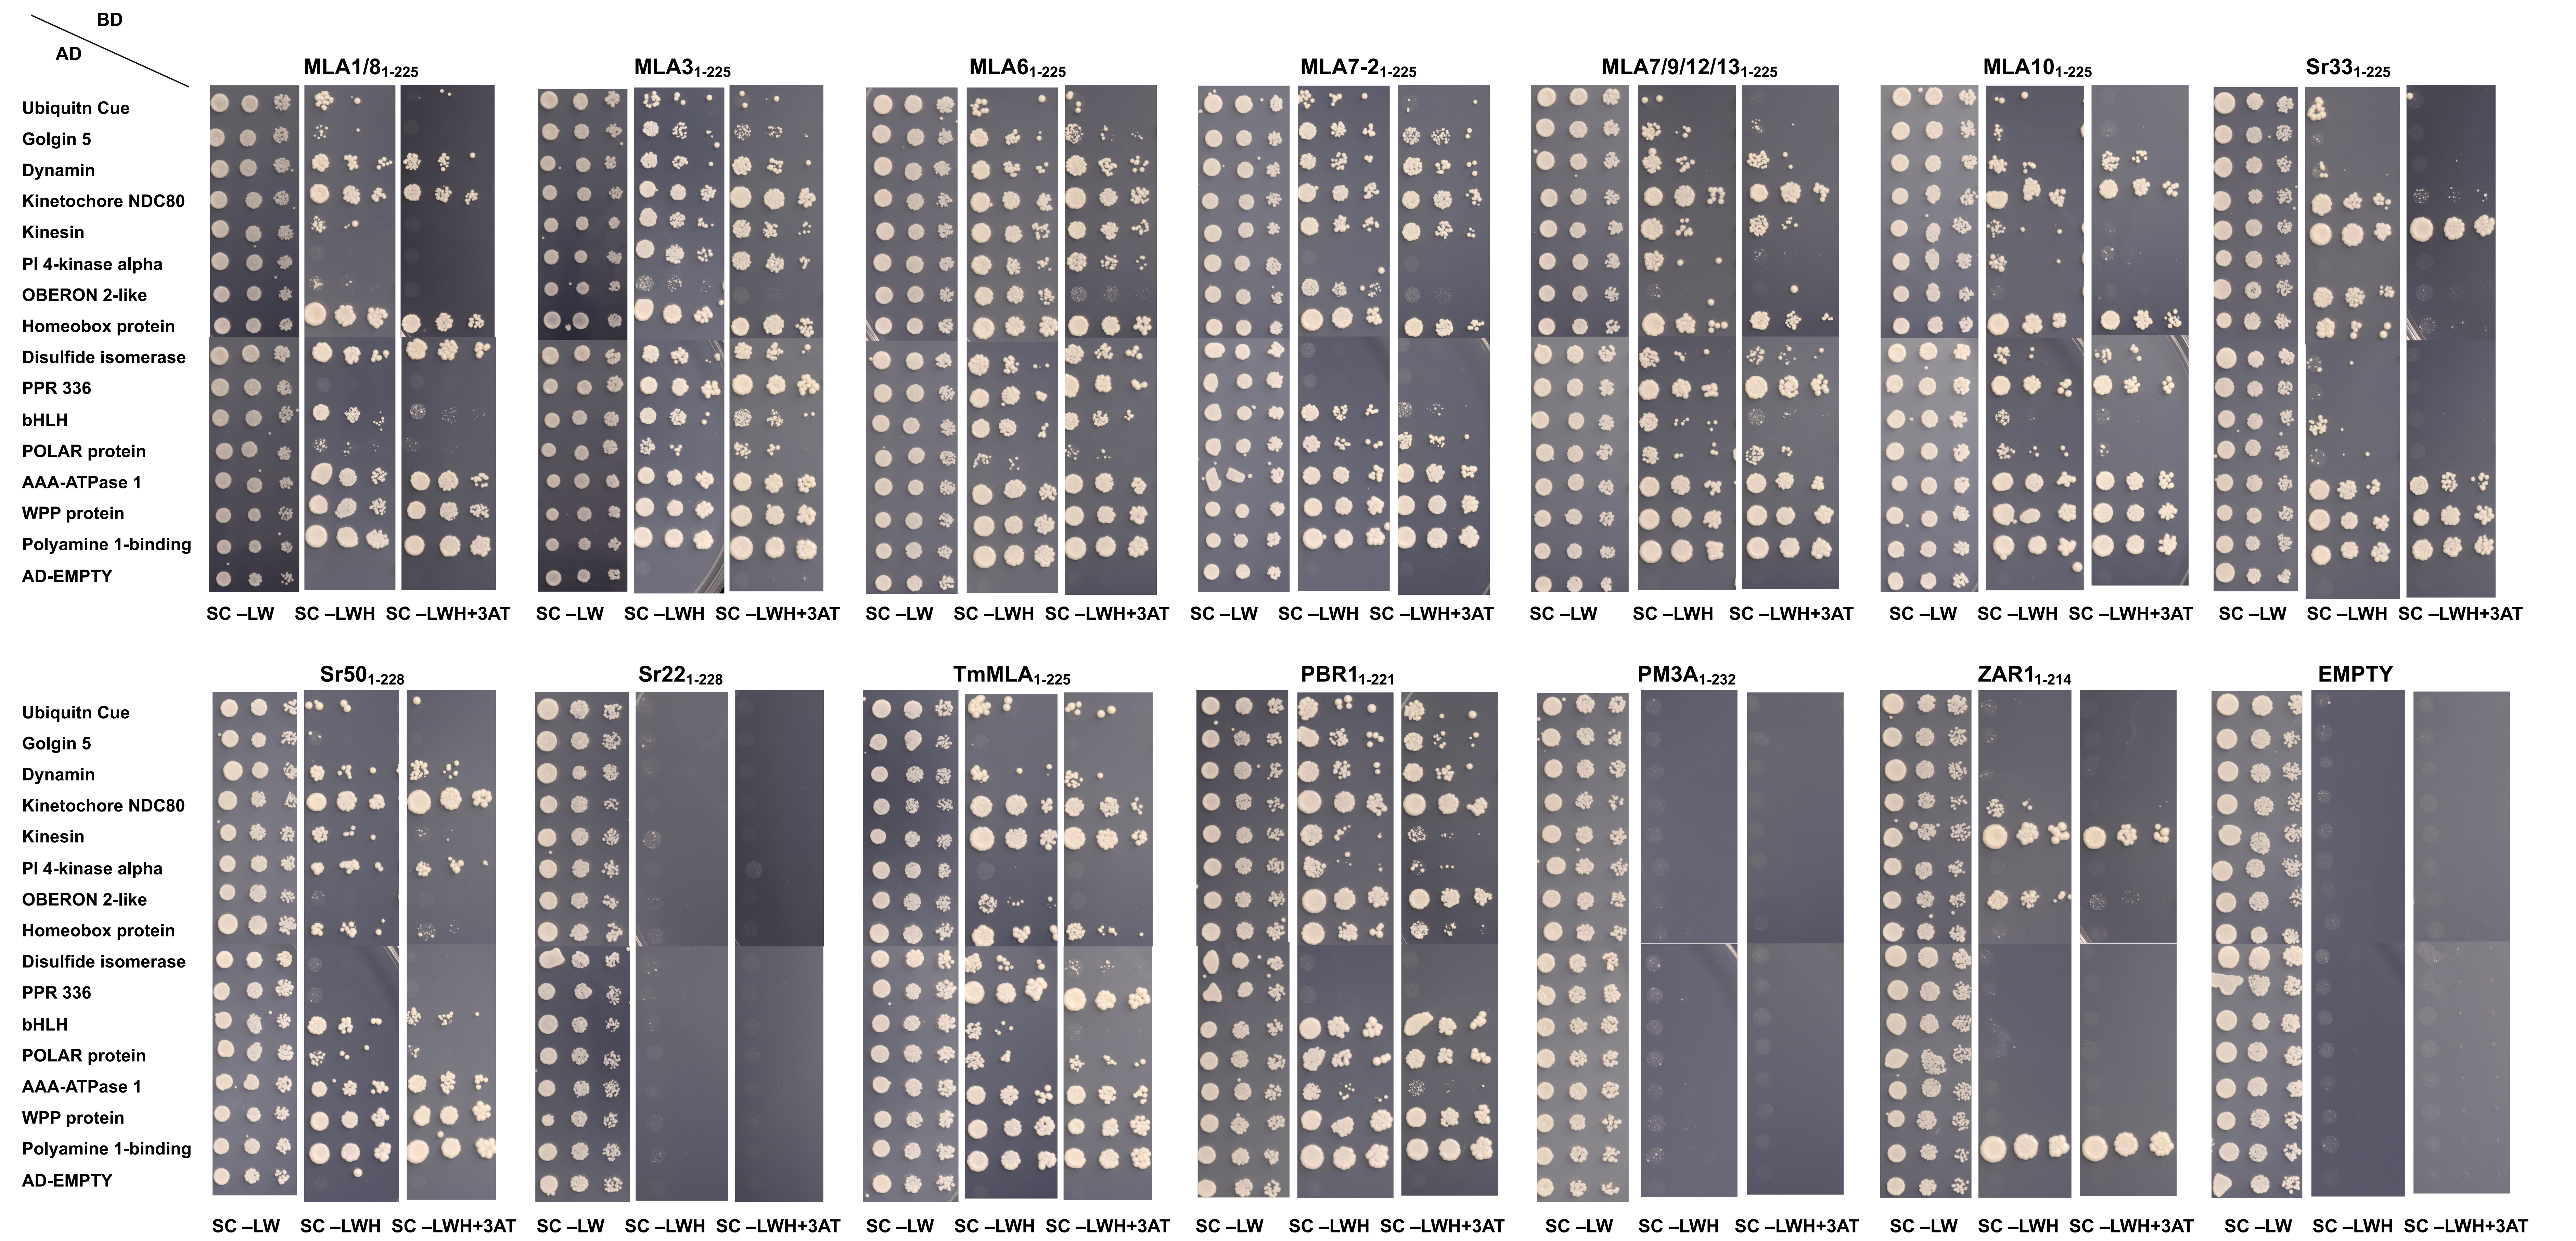

**S3 Figure. Y2H validation of interactions for the CC+NB domains of *Mla* alleles, orthologs and outgroup NLRs.** CC+NB domains of MLA1, MLA3, MLA7, MLA7-2, MLA8, MLA9, MLA10, MLA12, MLA13; orthologs TmMLA, Sr33 and Sr50; and the outgroup of Sr22, PBR1, PM3A and ZAR1 were cloned into bait vectors and tested for interactions with 15 novel prey candidates. SC-LW media was used as control for diploid growth, and the interaction was tested using selection with SC-LWH and SC-LWH + 0.5 mM 3-AT media.
