# Supplementary material
Source: publisher figshare collection journal article supplement (https://gsajournals.figshare.com/articles/dataset/_/19089992)
Supplement: Supplementary file 3 [file 1]

An interolog-based barley interactome as an integration framework for NLR immune signaling.

Valeria Velásquez-Zapata, J. Mitch Elmore, Greg Fuerst, Roger P. Wise

**S2 Text. Protein alignment of the *Mla* alleles, orthologs and outgroup used for Y2H tests**

|              |                                                                      |
|--------------|----------------------------------------------------------------------|
| MLA1/1-231   | ~~~~~MDIVT GAISNLIP.K LGELLTEEFK LHKGVKKNIE DLGKELESMN               |
| MLA3/1-231   | ~~~~~MDIVT GAISNLIP.K LGELLTEEFK LHKGVKKNIE DLGKELESMN               |
| MLA6/1-231   | ~~~~~MDIVT GAISNLIP.K LGELLTEEFK LHKGVKKNIE DLGKELESMN               |
| MLA7-2/1-233 | ~~~~~MDIVT GAISNLIP.K LGELLTEEFK LHKGVKKNIE DLGKELESMN               |
| MLA7/1-231   | ~~~~~MDIVT GAISNLIP.K LGELLTEEFK LHKGVKKNIE DLGKELESMN               |
| MLA8/1-231   | ~~~~~MDIVT GAISNLIP.K LGELLTEEFK LHKGVKKNIE DLGKELESMN               |
| MLA9/1-231   | ~~~~~MDIVT GAISNLIP.K LGELLTEEFK LHKGVKKNIE DLGKELESMN               |
| MLA10/1-231  | ~~~~~MDIVT GAISNLIP.K LGELLTEEFK LHKGVKKNIE DLGKELD <sup>Y</sup> SMN |
| MLA12/1-231  | ~~~~~MDIVT GAISNLIP.K LGELLTEEFK LHKGVKKNIE DLGKELESMN               |
| MLA13/1-231  | ~~~~~MDIVT GAISNLIP.K LGELLTEEFK LHKGVKKNIE DLGKELESMN               |
| TmMLA/1-231  | ~~~~~MDIVT GAIAKLIP.K LGELLVGEYK LHKGIKKNIE DLLKELNTMN               |
| Sr33/1-231   | ~~~~~MDIVT GAIAKLIP.K LGELLVGEYK LHKGVKKNIE DLLKELKTMN               |
| Sr50/1-234   | ~~~~~MNIVT GAMGSLIP.K LGELLMDEYK LHKRIKKDVE FLKKELESMH               |
| Sr22/1-229   | MAEVLVSAST GAMGSLLR.K LGAMLTDEYK LLKNVRGDIK FLKDELEVMC               |
| PBR1/1-226   | ~~~~~MVSALA GVMTSVIG.K LTALLGEEYA KLKGVHREVE FMKDELSSMN              |
| ZAR1/1-223   | ~~~~~MVD AVVTVFLE.K TLNILEEKGR TVSDYRKQLE DLQSELKYMQ                 |
| PM3A/1-233   | MAERVVTMAI GPLVSMLKDK ASSYLLDQYK VMEGMEEQHK ILKRKLPAIL               |

MLA1/1-231 AALIKIGEVV REQ LDSQDKL WADEVRELSY VIEDVVDKFL VQVDG...IQ  
 MLA3/1-231 AALIKIGEVV REQ LDSQDKL WADEVRELSY VIEDVVDKFL VQVDG...IK  
 MLA6/1-231 AALIKIGEVV REQ LDSQDKL WADEVRELSY VIEDVVDKFL VQVDG...IQ  
 MLA7-2/1-233 AALIKIGEVV REQ LDSQDKL WADEVRELSY VIEDVVDKFL VQVDG...IK  
 MLA7/1-231 AALIKIGEVV REQ LDSQDKL WADEVRELSY VIEDVVDKFL VQVDG...IK  
 MLA8/1-231 AALIKIGEVV REQ LDSQDKL WADEVRELSY VIEDVVDKFL VQVDG...IQ  
 MLA9/1-231 AALIKIGEVV REQ LDSQDKL WADEVRELSY VIEDVVDKFL VQVDG...IK  
 MLA10/1-231 AALIKIGEVV REQ LDSQDKL WADEVRELSY VIEDVVDKFL VQVDG...IK  
 MLA12/1-231 AALIKIGEVV REQ LDSQDKL WADEVRELSY VIEDVVDKFL VQVDG...IK  
 MLA13/1-231 AALIKIGEVV REQ LDSQDKL WADEVRELSY VIEDVVDKFL VQVDG...IK  
 TmMLA/1-231 AALIKIGEVV PDQLDSQDKL WADEVRELSY VIEDVVDKFL VRVHG...IE  
 Sr33/1-231 AALIKIGEVV PDQLDSQDKL WADEVRELSY VIEDAVDKFL VRVHG...VE  
 Sr50/1-234 AALIKIGEVV RDQLDRQVKL WADEVRELSY NMEDVVDKFL VRVDGDGIQQ  
 Sr22/1-229 AFLKMSDV. .EEPDEPTKL RVTAVREMSY KIEDNIDKFM VLVEQEHGSS  
 PBR1/1-226 ALLQRLAEAD RD.LDVQTKE WRDQVREMSY DIEDCMDDFM KSLGQ...TD  
 ZAR1/1-223 SFLKDAERQK RT..NETLRT LVADLRELVY EAEDILVDCQ L.ADGDDGNE  
 PM3A/1-233 DVITDVEEQA MAQREGAKA. WLQELRTVAY VANEVFDEFK YEALR...RE

MLA1/1-231 FDDNNNKFKG FMKRTT..EL LKKVKHKKHGI AHAIKDIEQ LQKVADRRDR  
 MLA3/1-231 SDDNNNKFKG LMKRTT..EL LKKVKHKKHGI AHAIKDIEQ LQKVADRRDR  
 MLA6/1-231 SDDNNNKFKG LMKRTT..EL LKKVKHKKHGI AHAIKDIEQ LQKVADRRDR  
 MLA7-2/1-233 SDDNNNKFKG LMKRTTLEL LKKVKHKKHGI AHAIKDIEQ LQKVADRRDR  
 MLA7/1-231 SDDNNNKFKG LMKRTT..EL LKKVKHKKHGI AHAIKDIEQ LQKVADRRDR  
 MLA8/1-231 FDDNNNKFKG FMKRTT..EL LKKVKHKKHGI AHAIKDIEQ LQKVADRRDR  
 MLA9/1-231 SDDNNNKFKG LMKRTT..EL LKKVKHKKHGI AHAIKDIEQ LQKVADRRDR  
 MLA10/1-231 SDDNNNKFKG LMKRTT..EL LKKVKHKKHGI AHAIKDIEQ LQKVADRRDR  
 MLA12/1-231 SDDNNNKFKG LMKRTT..EL LKKVKHKKHGI AHAIKDIEQ LQKVADRRDR  
 MLA13/1-231 SDDNNNKFKG LMKRTT..EL LKKVKHKKHGI AHAIKDIEQ LQKVADRRDR  
 TmMLA/1-231 PDDNTNGFKG LIKRTT..KL LKKVVVDKHGI AHAIKDIKE LQEVAARRDR  
 Sr33/1-231 PDDNTNGFKG LMKRTT..KL LKKVVVDKHGI AHAIKDIKE LQEVAARRDR  
 Sr50/1-234 PHDNSGRFKE LKNKMI..GL FKKGRNHHRI ADAIKEIEQ LQEVAARRDR  
 Sr22/1-229 CSEAAHGVAK LMDKCK..NL LPDIKARRRI AKEVKDIKE IKDVSDRFSR  
 PBR1/1-226 SAQTA....G LVQSVV..QQ LKALRARHQI SSKIQGLKAR VEDASKRRMR  
 ZAR1/1-223 QRSSNAWLSR LHP..... .ARVPLQYKK SKRLQEINER ITKISQVEP  
 PM3A/1-233 AKKNGHYIKL GFDVIKLFPT HNRVAFRYKM GRKLCLI... LQAVEVLIAE

MLA1/1-231 NKV..FVPHP TRTIAID... PCLRALYAEA TELVGIYGK. RDQDLMRLLS  
 MLA3/1-231 NKV..FVPHP TRTIAID... PCLRALYAEA TELVGIYGK. RDQDLMRLLS  
 MLA6/1-231 NKV..FVPHP TRPIAID... PCLRALYAEA TELVGIYGK. RDQDLMRLLS  
 MLA7-2/1-233 NKV..FVPHP TRTIAID... PCLRALYAEA TELVGIYGK. RDQGLMRLLS  
 MLA7/1-231 NKV..FVPHP TRTIAID... PCLRALYAEA TELVGIYGK. RDQGLMRLLS  
 MLA8/1-231 NKV..FVPHP TRTIAID... PCLRALYAEA TELVGIYGK. RDQDLMRLLS  
 MLA9/1-231 NKV..FVPHP TRTIAID... PCLRALYAEA TELVGIYGK. RDQGLMRLLS  
 MLA10/1-231 NKV..FVPHP TRTIAID... PCLRALYAEA TELVGIYGK. RDQGLMRLLS  
 MLA12/1-231 NKV..FVPHP TRTIAID... PCLRALYAEA TELVGIYGK. RDQGLMRLLS  
 MLA13/1-231 NKV..FVPHP TRTIAID... PCLRALYAEA TELVGIYGK. RDQGLMRLLS  
 TmMLA/1-231 NKFDGIASVP TE..AID... PRLRALYIEA AELVGIYGK. RDKELMSLLS  
 Sr33/1-231 NKFDGIASIP TE..AID... PRLRALYIEA AELVGIYGK. RDQELMSLLS  
 Sr50/1-234 NKV..AVPNP MEPITID... PCLRALYAEA TELVGIYGK. RDEELMRLLS  
 Sr22/1-229 YKIDSSSSM PAKDKVD... PRLRAVYKDA AELVGIDGP. KD.ELVKWL.  
 PBR1/1-226 YKLDERTFEP SISRAIN... PRLPSLYAEP DGLVGIDKP. RD.ELIKCL.  
 ZAR1/1-223 Y....FEFIT PSNVGRDNGT DRWSSPVYDH TQVVGLEGD. .KRKIKEWLF  
 PM3A/1-233 MQVFGFKYQP QPPVS..... KEWRHTDYVS IDPQEIASRS RHEDKKNIIG

MLA1/1-231 MEGDDASNKR LKKVSIVGFG GLGKTTLARA VYE..KIKGD FDCR~  
 MLA3/1-231 MEGDDASNKR LKKVSIVGFG GLGKTTLARA VYE..KIKGD FDCR~  
 MLA6/1-231 MEGDDASNKR LKKVSIVGFG GLGKTTLARA VYE..KIKGD FDCR~  
 MLA7-2/1-233 MEGDDASNKR LKKVSIVGFG GLGKTTLARA VYE..KIKGD FDCR~  
 MLA7/1-231 MEGDDASNKR LKKVSIVGFG GLGKTTLARA VYE..KIKGD FDCRC  
 MLA8/1-231 MEGDDASNKR LKKVSIVGFG GLGKTTLARA VYE..KIKGD FDCRC  
 MLA9/1-231 MEGDDASNKR LKKVSIVGFG GLGKTTLARA VYE..KIKGD FDCRC  
 MLA10/1-231 MEGDDASNKR LKKVSIVGFG GLGKTTLARA VYE..KIKGD FDCRC  
 MLA12/1-231 MEGDDASNKR LKKVSIVGFG GLGKTTLARA VYE..KIKGD FDCRC  
 MLA13/1-231 MEGDDASNKR LKKVSIVGFG GLGKTTLARA VYE..KIKGD FDCRC  
 TmMLA/1-231 LEGDDASTKK LKKVSIVGFG GLGKTTLARA VYE..KIKGD FGCHC  
 Sr33/1-231 LEGDDASTKK LKKVSIVGFG GLGKTTLAKA VYE..KIKGD FDCHC  
 Sr50/1-234 MEGDDASNKR LKKVSIVGFG GLGKTTLARA VYD..KIKGD FDCR~  
 Sr22/1-229 ...NEKEGQS LKSVSIVGYG GLGKTTLANQ IRV..NLGAT FDCG~  
 PBR1/1-226 MEGMGASVQQ QKVLIVGPG GLGKTTLANE VYR..KLEGQ FQCRG  
 ZAR1/1-223 RSNDS....Q LLIMAFVGMG GLGKTTIAQE VFNDKEIEHR FERRG  
 PM3A/1-233 ILVDEASNAD LTVVPVAMG GLGKTTLAQL IYNDPEIQKH FQLL~
