# Supplementary material
Source: publisher figshare collection journal article supplement (https://gsajournals.figshare.com/articles/dataset/_/19089992)
Supplement: Supplementary file 4 [file 1]

Top GO Enriched Terms

Core response

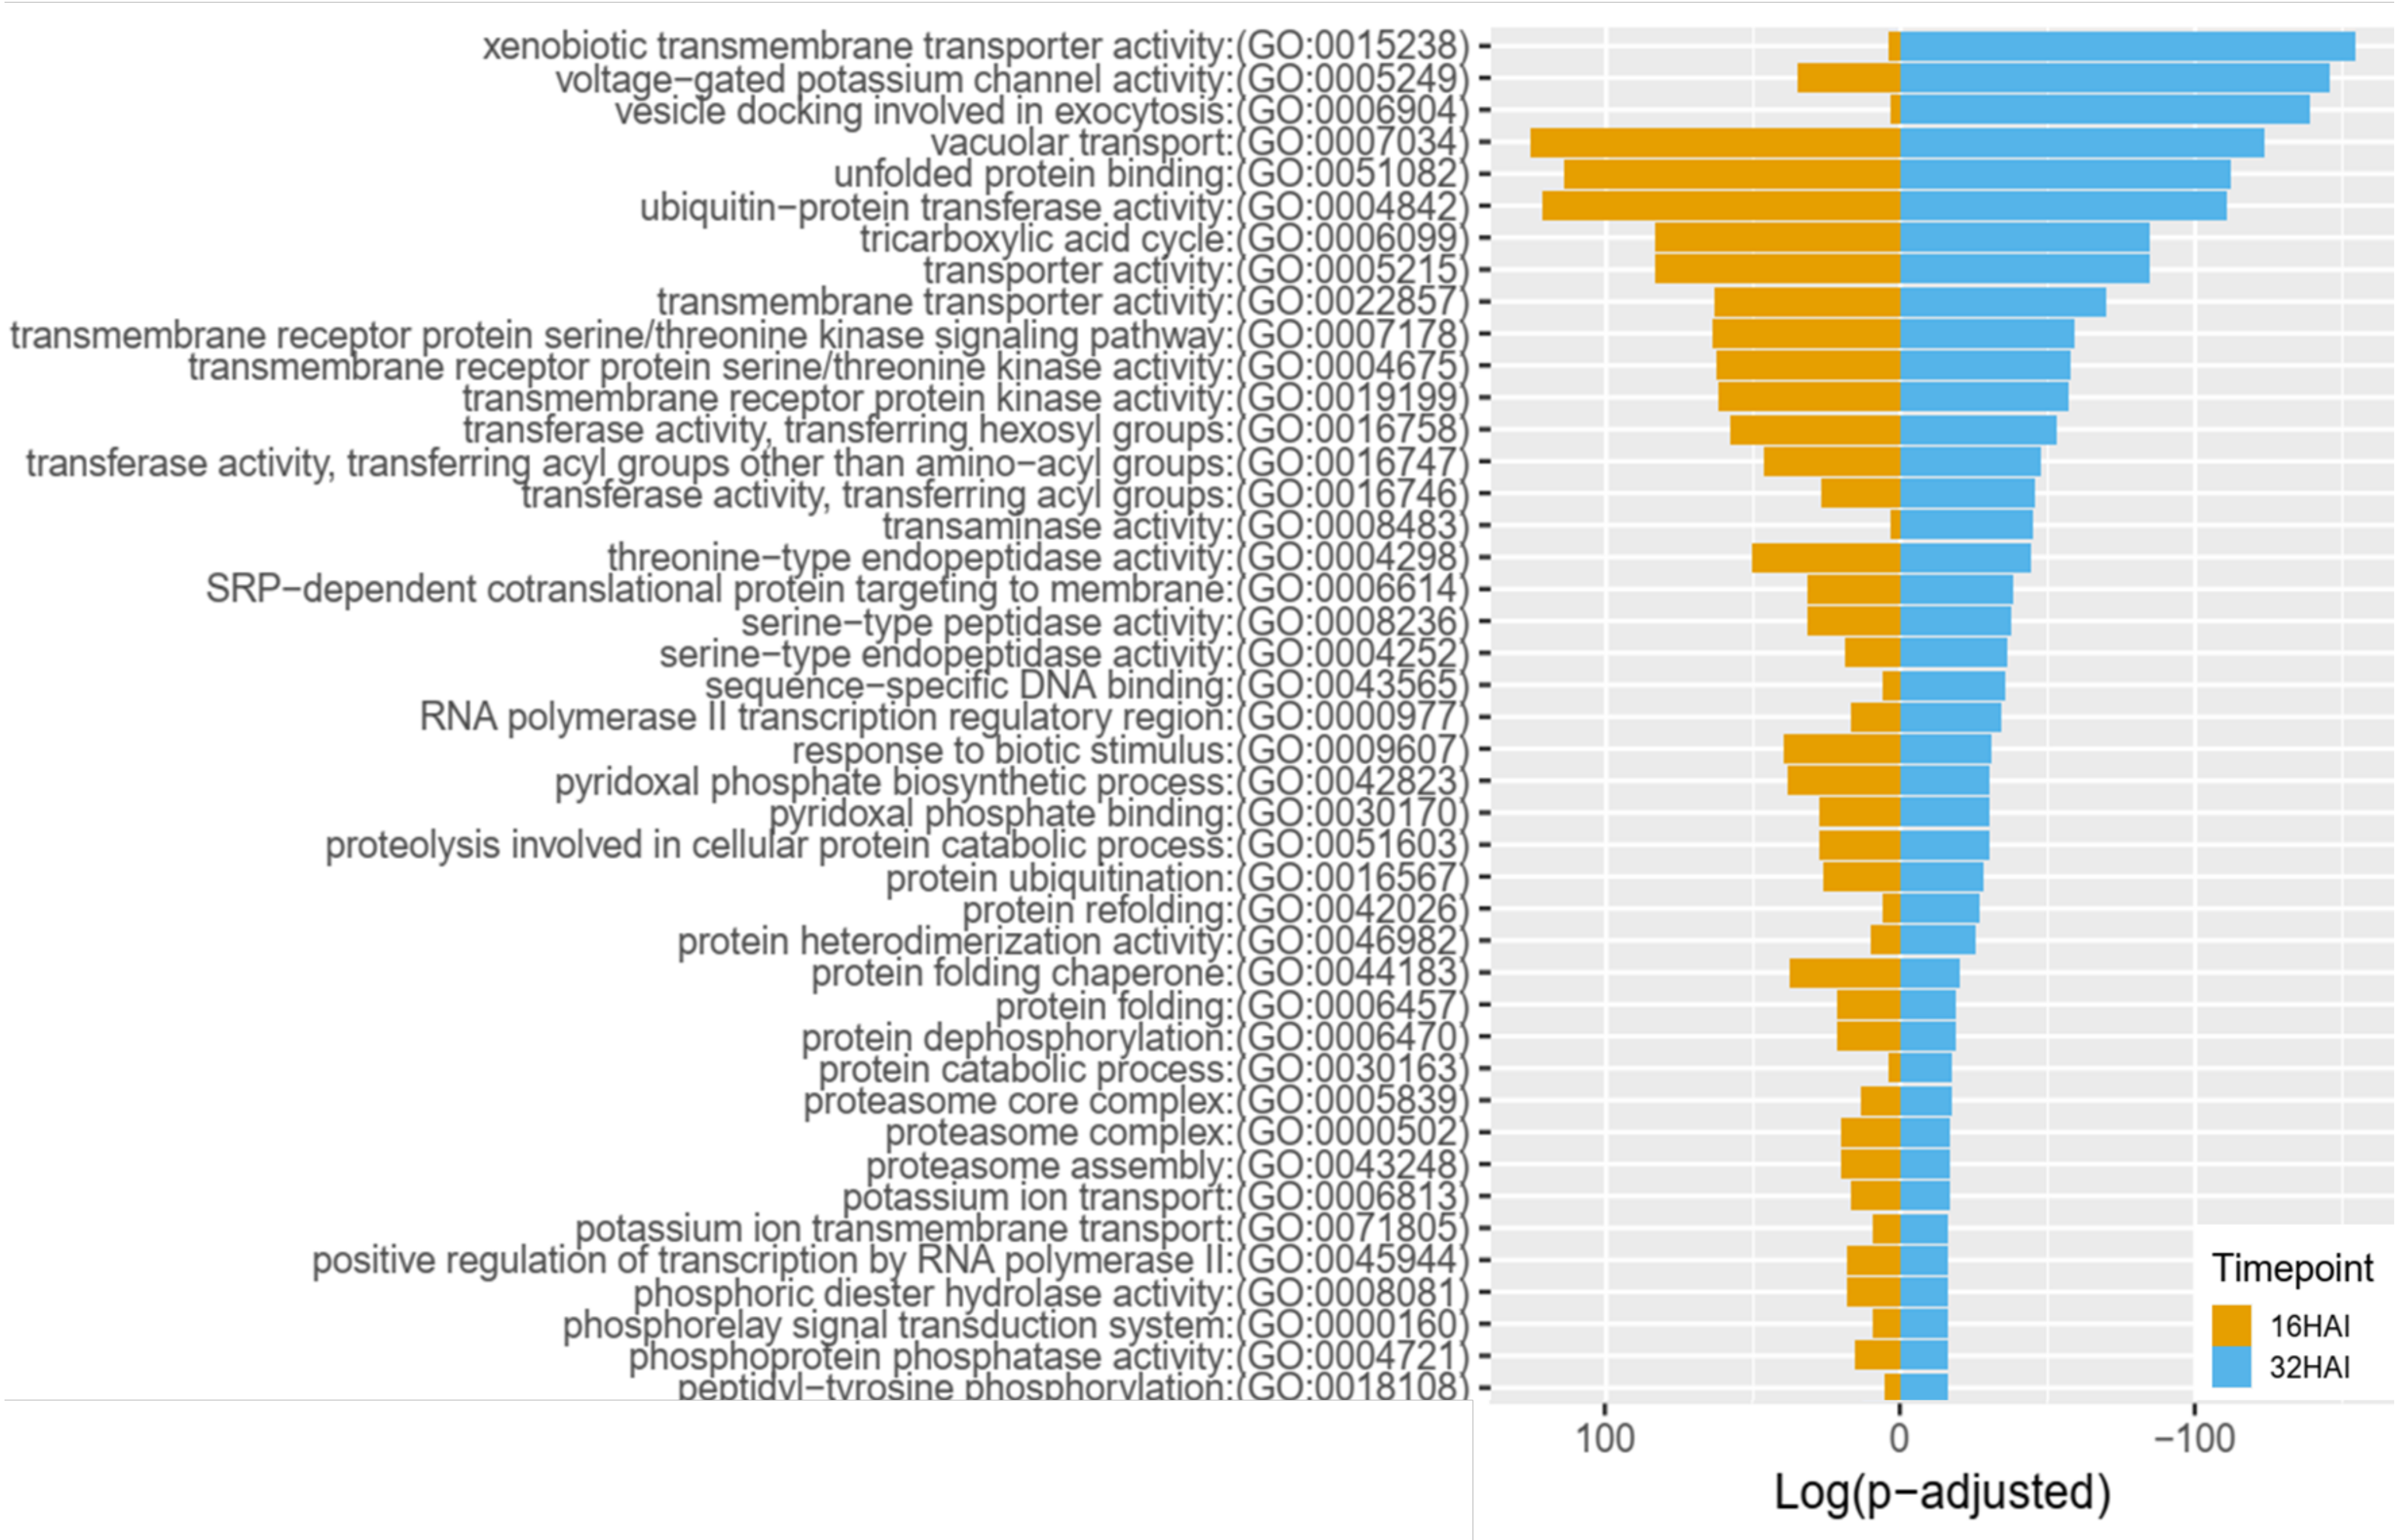

Unique response

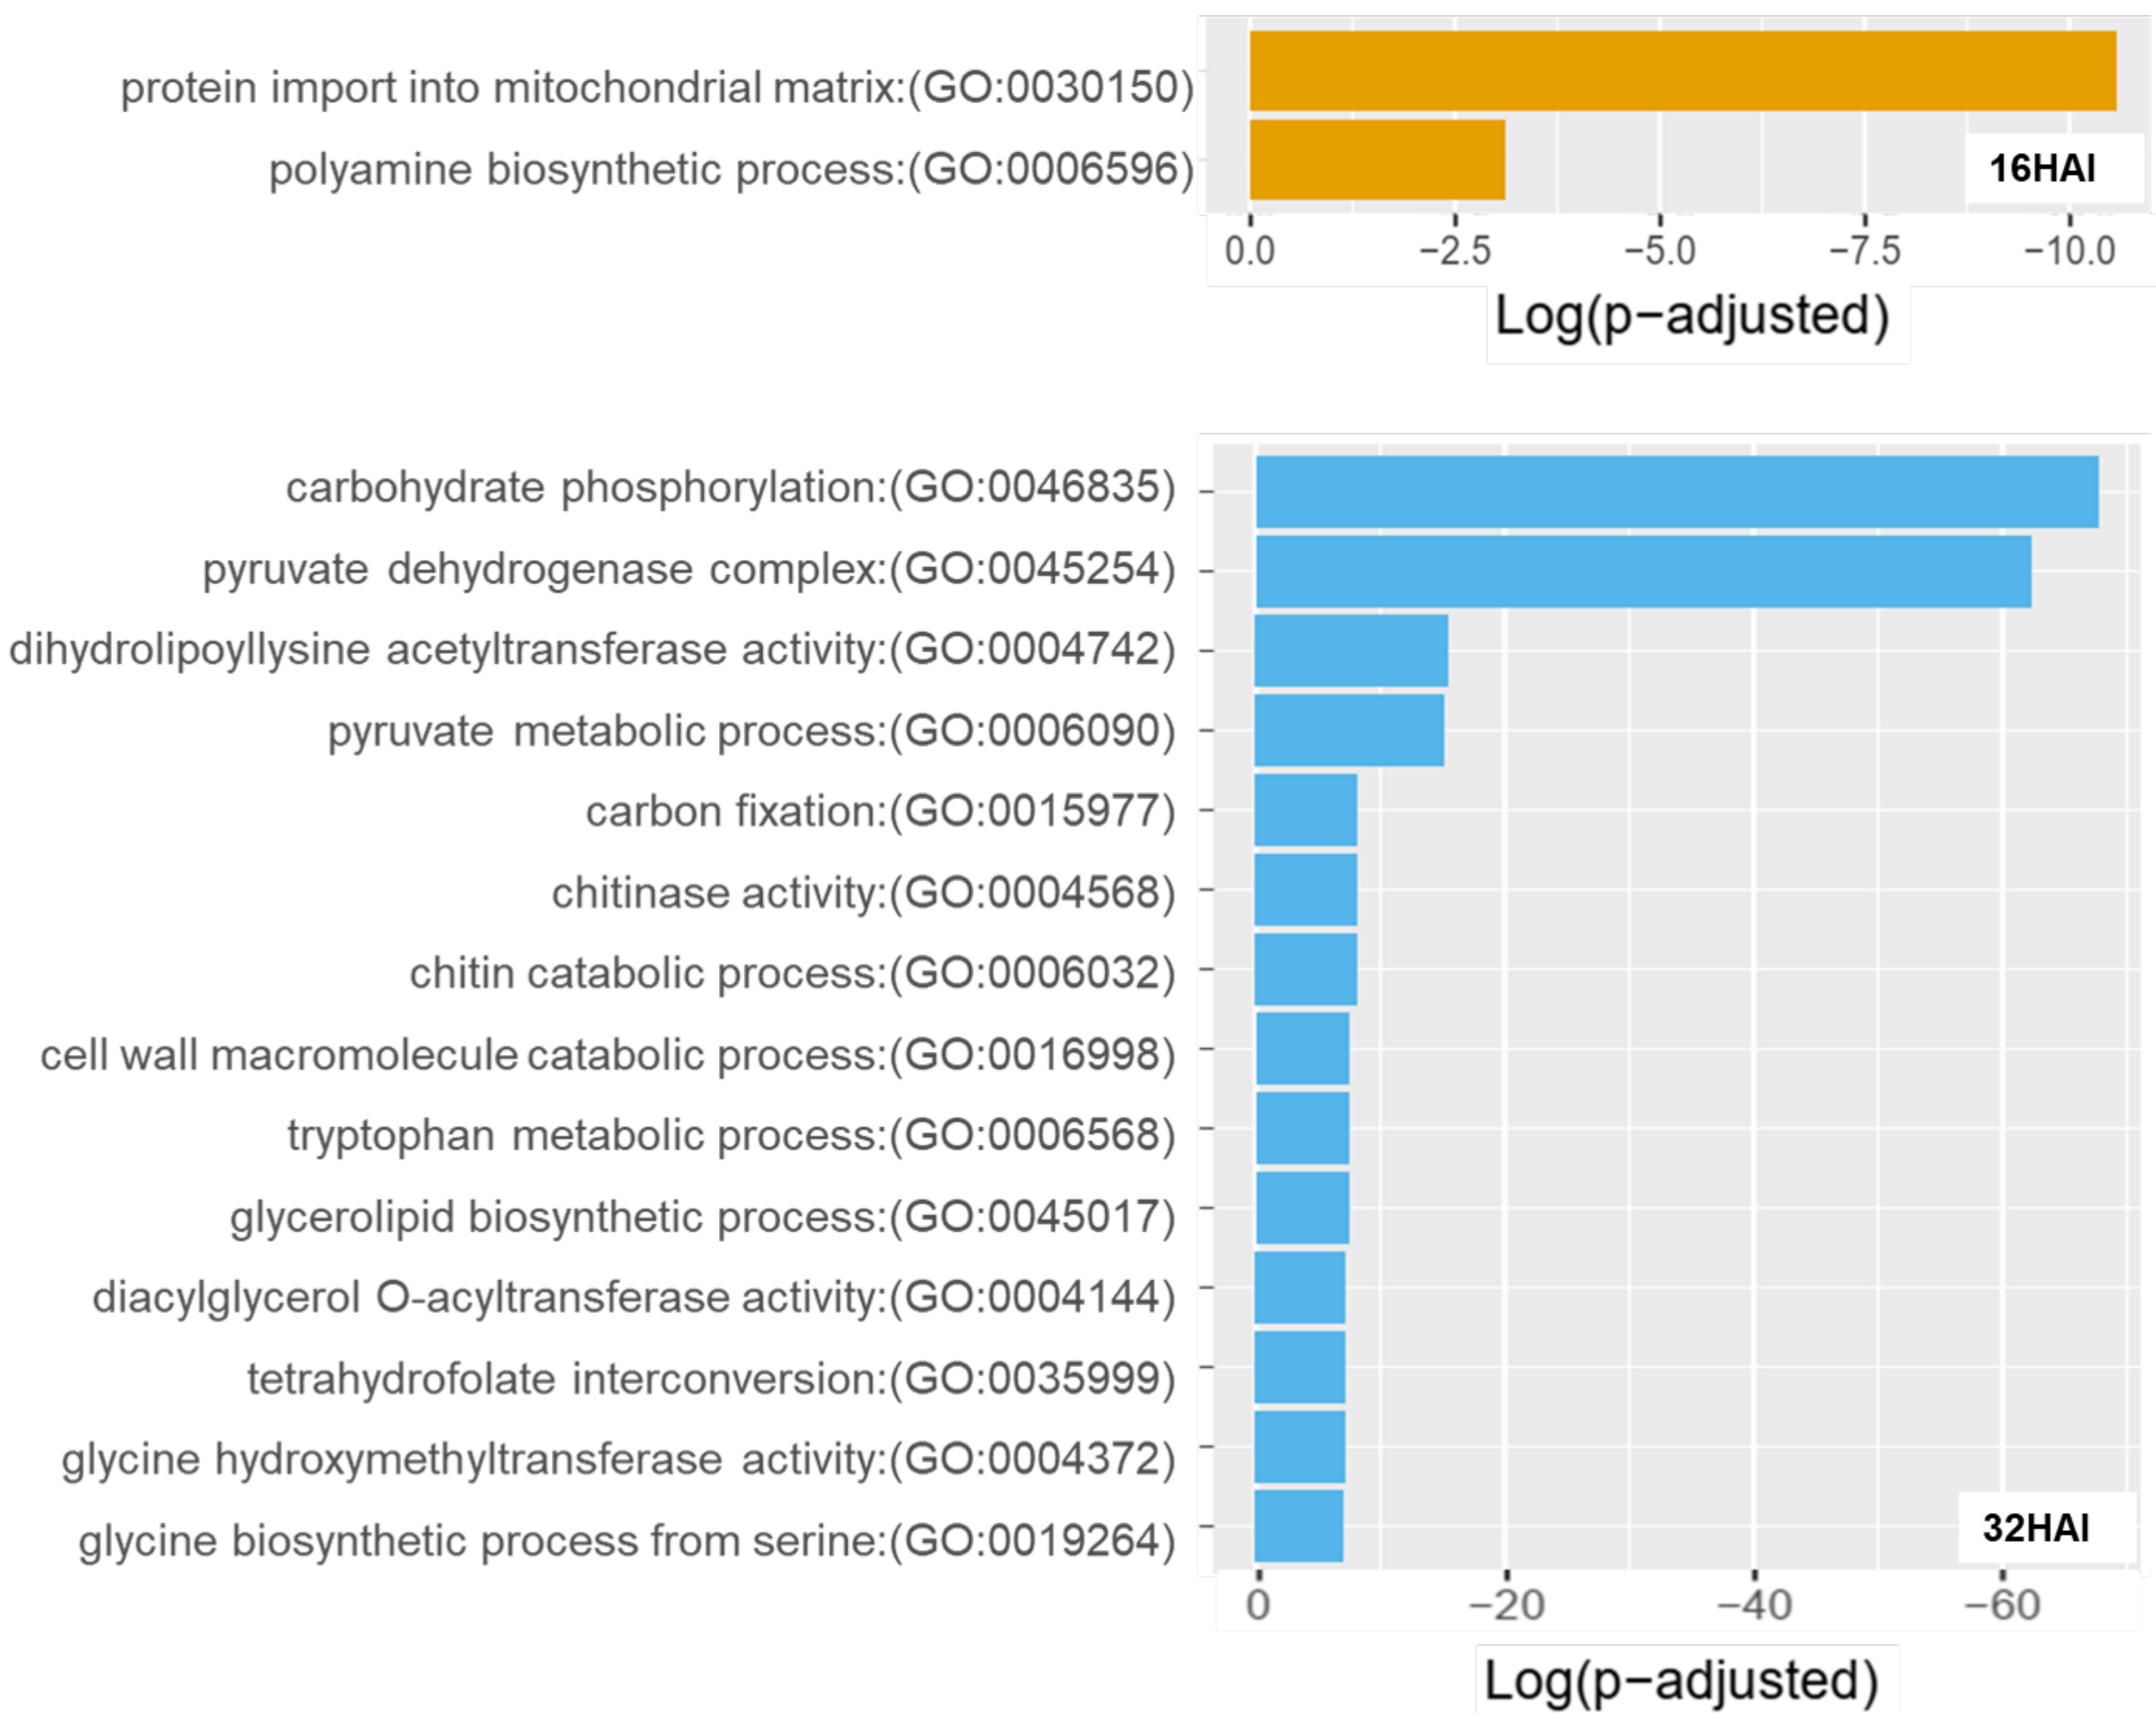

**S1 Figure. Core and unique GO terms from disease modules associated with DE genes by timepoint.** GO enrichment of disease modules was calculated by timepoint. Significant results (adjusted p-value <0.05) were separated into core and unique GO terms per timepoint.
