# Supplementary material
Source: publisher figshare collection journal article supplement (https://gsajournals.figshare.com/articles/dataset/_/19089992)
Supplement: Supplementary file 5 [file 1]

An interolog-based barley interactome as an integration framework for NLR immune signaling.

Valeria Velásquez-Zapata, J. Mitch Elmore, Greg Fuerst, Roger P. Wise

**S1 Text. Bait and prey sequences used for Y2H binary validation among *Mla* alleles, orthologs and outgroup NLRs.**

### **BAIT SEQUENCES**

#### ***Mla1\_1\_675\_AY009939.1\_Zhou\_2001***

ATGGATATTGTCACCGGTGCCATTTCCAACCTGATTCCCAAGTTGGGGGAGCTGCTCACG  
GAGGAGTTCAAGCTGCACAAGGGTGTCAAGAAAAATATTGAGGACCTCGGGAAGGAGCTT  
GAGAGCATGAACGCTGCCCTCATCAAGATTGGTGAGGTGCCGAGGGAGCAGCTCGACAG  
CCAAGACAAGCTCTGGGCCGATGAAGTCAGAGAGCTCTCCTACGTCATTGAGGATGTCGT  
CGACAAGTTCCTCGTACAGGTTGATGGCATTCAAGTTTGATGATAACAACAACAAATTTAAGG  
GGTTCATGAAGAGGACGACCGAGTTGTTGAAGAAAGTCAAGCATAAGCATGGGATAGCTC  
ACGCGATCAAGGACATCCAAGAGCAACTCCAAAAGGTGGCTGATAGGCGTGACAGGAACA  
AGGTATTTGTTCCCTCATCCTACGAGAACAATTGCTATTGACCCTTGCCTTCGAGCTTTGTAT  
GCTGAAGCGACAGAGCTAGTTGGCATATATGGAAAGAGGGATCAAGACCTCATGAGGTTG  
CTTCCATGGAGGGCGATGATGCCTCTAATAAGAGACTGAAGAAGGTCTCCATTGTTGGAT  
TTGGAGGGTTGGGCAAGACCACTCTTGCTAGAGCGGTATACGAGAAGATTAAAGGTGATT  
CGATTGTCCG

#### ***Mla3\_1\_675\_Baronesse\_Moscou\_2021***

ATGGATATTGTCACCGGTGCCATTTCCAACCTGATTCCCAAGTTGGGGGAGCTACTCACGG  
AGGAGTTCAAGCTGCACAAGGGTGTCAAGAAAAATATTGAGGACCTCGGGAAGGAGCTTG  
AGAGCATGAACGCTGCCCTCATCAAGATTGGTGAGGTGCCGAGGGAGCAGCTCGACAGC  
CAAGACAAGCTCTGGGCCGATGAGGTCAGAGAGCTCTCCTACGTCATTGAGGATGTCGTC  
GACAAGTTCCTCGTACAGGTTGATGGCATTAAAGTCTGATGATAACAACAACAAATTTAAGG  
GGCTCATGAAGAGGACTACCGAGTTGTTGAAGAAAGTCAAGCATAAGCATGGGATAGCTC  
ACGCGATCAAGGACATCCAAGAGCAACTCCAAAAGGTGGCTGATAGGCGTGACAGGAACA  
AGGTATTTGTTCCCTCATCCTACGAGAACAATTGCTATTGACCCTTGCCTTCGAGCTTTGTAT  
GCTGAAGCGACAGAGCTAGTTGGCATATATGGAAAGAGGGATCAAGACCTCATGAGGTTG  
CTTCCATGGAGGGCGATGATGCCTCTAATAAGAGACTGAAGAAGGTCTCCATTGTTGGAT  
TTGGAGGGTTGGGCAAGACCACTCTTGCTAGAGCGGTATACGAGAAGATTAAAGGTGATT  
CGATTGTCCG

#### ***Mla6\_1\_675\_AJ302292.1\_Halterman\_2001***

ATGGATATTGTCACCGGTGCCATTTCCAACCTGATTCCCAAGTTGGGGGAGCTGCTCACG  
GAGGAGTTCAAGCTGCACAAGGGTGTCAAGAAAAATATTGAGGACCTCGGGAAGGAGCTT  
GAGAGCATGAACGCTGCCCTCATCAAGATTGGTGAGGTGCCGAGGGAGCAGCTCGACAG  
CCAAGACAAGCTCTGGGCCGATGAGGTCAGAGAGCTCTCCTACGTCATTGAGGATGTCGT

CGACAAATTCCTCGTACAGGTTGATGGCATTGAGTCTGATGATAACAACAACAAATTTAAGG  
GGCTCATGAAGAGGACGACCGAGTTGTTGAAGAAAGTCAAGCATAAGCATGGGATAGCTC  
ACGCGATCAAGGACATCCAAGAGCAACTCCAAAAGGTGGCTGATAGGCGTGACAGGAACA  
AGGTATTTGTTTCCTCATCCTACGAGACCAATTGCTATTGACCCTTGCCTTCGAGCTTTGTAT  
GCTGAAGCGACAGAGCTAGTTGGCATATATGGAAAGAGGGATCAAGACCTCATGAGGTTG  
CTTTCCATGGAGGGCGATGATGCCTCTAATAAGAGACTGAAGAAGGTCTCCATTGTTGGAT  
TTGGAGGGTTGGGCAAGACCACTCTTGCTAGAGCGGTATACGAGAAGATTAAAGGTGATT  
TGATTGTCGG

**Mla7-2\_1\_681\_AY266444\_Halterman\_2004**

ATGGATATTGTCACCGGTGCCATTTCCAACCTGATTCCCAAGTTGGGGGAGCTACTCACGG  
AGGAGTTCAAGCTGCACAAGGGTGTCAAGAAAAATATTGAGGACCTCGGGAAGGAGCTTG  
AGAGCATGAACGCTGCCCTCATCAAGATTGGTGAGGTGCCGAGGGAGCAGCTCGACAGC  
CAAGACAAGCTCTGGGCCGATGAGGTCAGAGAGCTCTCCTACGTCATTGAGGATGTCGTC  
GACAAGTTCCTCGTACAGGTTGATGGCATTAAGTCTGATGATAACAACAACAAATTTAAGG  
GGCTCATGAAGAGGACTACCGAGTTGGAGTTGTTGAAGAAAGTCAAGCATAAGCATGGGA  
TAGCTCACGCGATCAAGGACATCCAAGAGCAACTCCAAAAGGTGGCTGATAGGCGTGACA  
GGAACAAGGTATTTGTTTCCTCATCCTACGAGAACAATTGCTATTGACCCTTGCCTTCGAGCT  
TTGTATGCTGAAGCGACAGAGCTAGTTGGCATATATGGAAAGAGGGATCAAGGCCTCATGA  
GGTTGCTTTCCATGGAGGGCGATGATGCCTCTAATAAGAGACTGAAGAAGGTCTCCATTGT  
TGATTGTTGGAGGGTTGGGCAAGACCACTCTTGCTAGAGCGGTATACGAGAAGATTAAAGG  
TGATTTGATTGTCGG

**Mla7\_1\_675\_MZ555770\_Bettgenhaeuser 2021**

ATGGATATTGTCACCGGTGCCATTTCCAACCTGATTCCCAAGTTGGGGGAGCTACTCACGG  
AGGAGTTCAAGCTGCACAAGGGTGTCAAGAAAAATATTGAGGACCTCGGGAAGGAGCTTG  
AGAGCATGAACGCTGCCCTCATCAAGATTGGTGAGGTGCCGAGGGAGCAGCTCGACAGC  
CAAGACAAGCTCTGGGCCGATGAGGTCAGAGAGCTCTCCTACGTCATTGAGGATGTCGTC  
GACAAGTTCCTCGTACAGGTTGATGGCATTAAGTCTGATGATAACAACAACAAATTTAAGG  
GGCTCATGAAGAGGACTACCGAGTTGTTGAAGAAAGTCAAGCATAAGCATGGGATAGCTC  
ACGCGATCAAGGACATCCAAGAGCAACTCCAAAAGGTGGCTGATAGGCGTGACAGGAACA  
AGGTATTTGTTTCCTCATCCTACGAGAACAATTGCTATTGACCCTTGCCTTCGAGCTTTGTAT  
GCTGAAGCGACAGAGCTAGTTGGCATATATGGAAAGAGGGATCAAGGCCTCATGAGGTTG  
CTTTCCATGGAGGGCGATGATGCCTCTAATAAGAGACTGAAGAAGGTCTCCATTGTTGGAT  
TTGGAGGGTTGGGCAAGACCACTCTTGCTAGAGCGGTATACGAGAAGATTAAAGGTGATT  
CGATTGTCGG

**Mla8\_1\_675\_GU245940.1\_Seeholzer\_2010**

ATGGATATTGTCACCGGTGCCATTTCCAACCTGATTCCCAAGTTGGGGGAGCTGCTCACG  
GAGGAGTTCAAGCTGCACAAGGGTGTCAAGAAAAATATTGAGGACCTCGGGAAGGAGCTT  
GAGAGCATGAACGCTGCCCTCATCAAGATTGGTGAGGTGCCGAGGGAGCAGCTCGACAG  
CCAAGACAAGCTCTGGGCCGATGAAGTCAGAGAGCTCTCCTACGTCATTGAGGATGTCGT  
CGACAAGTTCCTCGTACAGGTTGATGGCATTGAGTTTATGATGATAACAACAACAAATTTAAGG  
GGTTCATGAAGAGGACGACCGAGTTGTTGAAGAAAGTCAAGCATAAGCATGGGATAGCTC

ACGCGATCAAGGACATCCAAGAGCAACTCCAAAAGGTGGCTGATAGGCGTGACAGGAACA  
AGGTATTTGTTTCCTCATCCTACGAGAACAATTGCTATTGACCCTTGCCTTCGAGCTTTGTAT  
GCTGAAGCGACAGAGCTAGTTGGCATATATGGAAAGAGGGATCAAGACCTCATGAGGTTG  
CTTTCCATGGAGGGCGATGATGCCTCTAATAAGAGACTGAAGAAGGTCTCCATTGTTGGAT  
TTGGAGGGTTGGGCAAGACCACTCTTGCTAGAGCGGTATACGAGAAGATTAAAGGTGATT  
CGATTGTCGG

**Mla9\_1\_675\_GU245941.1\_Seeholzer\_2010**

ATGGATATTGTCACCGGTGCCATTTCCAACCTGATTCCCAAGTTGGGGGAGCTACTCACGG  
AGGAGTTCAAGCTGCACAAGGGTGTCAAGAAAAATATTGAGGACCTCGGGAAGGAGCTTG  
AGAGCATGAACGCTGCCCTCATCAAGATTGGTGAGGTGCCGAGGGAGCAGCTCGACAGC  
CAAGACAAGCTCTGGGCCGATGAGGTCAGAGAGCTCTCCTACGTCATTGAGGATGTCGTC  
GACAAGTTCCTCGTACAGGTTGATGGCATTAAGTCTGATGATAACAACAACAAATTTAAGG  
GGCTCATGAAGAGGACTACCGAGTTGTTGAAGAAAGTCAAGCATAAGCATGGGATAGCTC  
ACGCGATCAAGGACATCCAAGAGCAACTCCAAAAGGTGGCTGATAGGCGTGACAGGAACA  
AGGTATTTGTTTCCTCATCCTACGAGAACAATTGCTATTGACCCTTGCCTTCGAGCTTTGTAT  
GCTGAAGCGACAGAGCTAGTTGGCATATATGGAAAGAGGGATCAAGGCCTCATGAGGTTG  
CTTTCCATGGAGGGCGATGATGCCTCTAATAAGAGACTGAAGAAGGTCTCCATTGTTGGAT  
TTGGAGGGTTGGGCAAGACCACTCTTGCTAGAGCGGTATACGAGAAGATTAAAGGTGATT  
CGATTGTCGG

**Mla10\_1\_675\_AY266445.1\_Halterman\_2004**

ATGGATATTGTCACCGGTGCCATTTCCAACCTGATTCCCAAGTTGGGGGAGCTACTCACGG  
AGGAGTTCAAGCTGCACAAGGGTGTCAAGAAAAATATTGAGGACCTCGGGAAGGAGCTTG  
ATAGCATGAACGCTGCCCTCATCAAGATTGGTGAGGTGCCGAGGGAGCAGCTCGACAGCC  
AAGACAAGCTCTGGGCCGATGAGGTCAGAGAGCTCTCCTACGTCATTGAGGATGTCGTCG  
ACAAGTTCCTCGTACAGGTTGATGGCATTAAGTCTGATGATAACAACAACAAATTTAAGG  
GCTCATGAAGAGGACTACCGAGTTGTTGAAGAAAGTCAAGCATAAGCATGGGATAGCTCAC  
GCGATCAAGGACATCCAAGAGCAACTCCAAAAGGTGGCTGATAGGCGTGACAGGAACAAG  
GTATTTGTTTCCTCATCCTACGAGAACAATTGCTATTGACCCTTGCCTTCGAGCTTTGTATGC  
TGAAGCGACAGAGCTAGTTGGCATATATGGAAAGAGGGATCAAGGCCTCATGAGGTTGCT  
TTCCATGGAGGGCGATGATGCCTCTAATAAGAGACTGAAGAAGGTCTCCATTGTTGGATT  
GGAGGGTTGGGCAAGACCACTCTTGCTAGAGCGGTATACGAGAAGATTAAAGGTGATTTC  
GATTGTCGG

**Mla12\_1\_675\_AY196347.1\_Shen\_2003**

ATGGATATTGTCACCGGTGCCATTTCCAACCTGATTCCCAAGTTGGGGGAGCTACTCACGG  
AGGAGTTCAAGCTGCACAAGGGTGTCAAGAAAAATATTGAGGACCTCGGGAAGGAGCTTG  
AGAGCATGAACGCTGCCCTCATCAAGATTGGTGAGGTGCCGAGGGAGCAGCTCGACAGC  
CAAGACAAGCTCTGGGCCGATGAGGTCAGAGAGCTCTCCTACGTCATTGAGGATGTCGTC  
GACAAGTTCCTCGTACAGGTTGATGGCATTAAGTCTGATGATAACAACAACAAATTTAAGG  
GGCTCATGAAGAGGACTACCGAGTTGTTGAAGAAAGTCAAGCATAAGCATGGGATAGCTC  
ACGCGATCAAGGACATCCAAGAGCAACTCCAAAAGGTGGCTGATAGGCGTGACAGGAACA  
AGGTATTTGTTTCCTCATCCTACGAGAACAATTGCTATTGACCCTTGCCTTCGAGCTTTGTAT

GCTGAAGCGACAGAGCTAGTTGGCATATATGGAAAGAGGGATCAAGGCCTCATGAGGTTG  
CTTTCCATGGAGGGCGATGATGCCTCTAATAAGAGACTGAAGAAGGTCTCCATTGTTGGAT  
TTGGAGGGTTGGGCAAGACCACTCTTGCTAGAGCGGTATACGAGAAGATTAAAGGTGATT  
CGATTGTCCG

**Mla13\_1\_675\_AF523683.1\_Halterman\_2003**

ATGGATATTGTCACCGGTGCCATTTCCAACCTGATTCCCAAGTTGGGGGAGCTACTCACGG  
AGGAGTTCAAGCTGCACAAGGGTGTCAAGAAAAATATTGAGGACCTCGGGAAGGAGCTTG  
AGAGCATGAACGCTGCCCTCATCAAGATTGGTGAGGTGCCGAGGGAGCAGCTCGACAGC  
CAAGACAAGCTCTGGGCCGATGAGGTCAGAGAGCTCTCCTACGTCATTGAGGATGTCGTC  
GACAAGTTCCTCGTACAGGTTGATGGCATTAAGTCTGATGATAACAACAACAAATTTAAGG  
GGCTCATGAAGAGGACTACCGAGTTGTTGAAGAAAGTCAAGCATAAGCATGGGATAGCTC  
ACGCGATCAAGGACATCCAAGAGCAACTCCAAAAGGTGGCTGATAGGCGTGACAGGAACA  
AGGTATTTGTTCCCTCATCCTACGAGAACAATTGCTATTGACCCTTGCCCTTCGAGCTTTGTAT  
GCTGAAGCGACAGAGCTAGTTGGCATATATGGAAAGAGGGATCAAGGCCTCATGAGGTTG  
CTTTCCATGGAGGGCGATGATGCCTCTAATAAGAGACTGAAGAAGGTCTCCATTGTTGGAT  
TTGGAGGGTTGGGCAAGACCACTCTTGCTAGAGCGGTATACGAGAAGATTAAAGGTGATT  
CGATTGTCCG

**Sr33\_1\_675\_KF031297.1\_Periyanan\_2013**

ATGGATATTGTCACGGGTGCCATTGCCAAGCTGATCCCCAAGCTGGGAGAACTGCTTGTG  
GGGGAGTACAACTGCACAAGGGCGTCAAGAAAAATATCGAGGACCTCCTGAAAGAGCTC  
AAGACCATGAACGCTGCGCTCATCAAGATTGGTGAGGTGCCGCCGGACCAGCTCGACAGC  
CAAGACAAGCTTTGGGCCGATGAGGTCAGAGAGCTCTCCTACGTCATTGAGGATGCGGTG  
GACAAGTTCCTCGTACGGGTCCATGGCGTTGAGCCCGACGACAACACCAACGGATTCAAG  
GGGCTCATGAAGAGGACCACCAAGTTGTTGAAGAAAGTCGTGGATAAGCATGGAATAGCT  
CACGCGATCAAGGACATCAAGAAGGAACTCCAGGAGGTGGCTGCTAGGCGTGACAGGAA  
CAAGTTCGATGGTATTGCTTCTATTCTACTGAAGCAATTGATCCTCGTCTCCGTGCTCTAT  
ACATAGAAGCGGCAGAGCTAGTTGGCATCTATGGGAAGAGGGATCAGGAGCTCATGAGTT  
TGCTCTCCTTGGAGGGCGATGATGCCTCTACCAAGAACTGAAGAAGGTCTCCATTGTTGG  
ATTTGGAGGGTTGGGCAAGACCACTCTTGCCAAAGCAGTATACGAGAAGATTAAAGGTGAT  
TTTGATTGTAC

**Sr50\_1\_684\_KT725812.1\_Mago\_2015**

ATGAATATTGTCACGGGGGCCATGGGCAGCCTGATCCCCAAGTTGGGCGAGCTGCTCATG  
GATGAGTACAAGCTGCACAAGCGCATCAAGAAAGATGTTGAGTTCCTCAAGAAGGAGCTTG  
AGAGCATGCACGCTGCCCTCATCAAGTTGGCGAGGTGCCGCCGGACCAGCTCGACAGG  
CAAGTCAAGCTCTGGGCCGACGAGGTCAGAGAGCTCTCCTACAACATGGAGGATGTCGTC  
GACAAGTTCCTCGTACGCGTCGACGGCGACGGCATTACGACGCCTCACGACAACCTCCGGC  
AGATTTAAGGAGCTCAAGAACAAGATGATCGGCTTGTTTAAGAAAGGCAGGAATCACCATC  
GCATAGCTGACGCGATCAAGGAAATCAAGGAGCAACTCCAGGAGGTGGCTGCTAGGCGT  
GACAGGAACAAGGTAGCTGTTTCTAATCCTATGGAACCAATTACTATCGATCCTTGTCTTCG  
AGCTTTGTACGCAGAAGCGACAGAGCTAGTTGGCATATATGGGAAGAGGGATGAGGAGCT  
CATGAGGTTGCTCTCCATGGAGGGTGATGATGCCTCTAACAAGAGACTAAAGAAGGTCTCC

ATTGTTGGATTTGGAGGGTTGGGCAAGACCACTCTTGCTAGAGCAGTATACGACAAGATTA  
AAGGTGATTTTGATTGTCGG

**Sr22\_SCHOMBURGK\_1\_684\_LN883743.1\_Steuernagel\_2016**

ATGGCGGAAGTTCTGGTGAGCGCATCCACAGGGGCAATGGGTTCCCTCCTGCGGAAGTTG  
GGAGCTATGTTGACGGATGAATACAAGCTGCTCAAGAACGTCCGTGGGGACATCAAGTTC  
CTCAAGGACGAGCTGGAGGTCATGTGCGCGTTCCTCCTCAAGATGTCAGATGTGGAGGAG  
CCTGACGAACCAACAAAGCTGCGTGTGACGGCGGTGCGGGAGATGTCCTATAAGATAGAG  
GACAACATCGACAAGTTCATGGTCCTCGTGGAACAGGAACACGGGTCCTCCTGTTCCGAG  
GCGGCTCATGGCGTCGCCAAGCTCATGGACAAGTGCAAGAACTTGCTGCCGGACATCAAG  
GCCCCCGCAGGATCGCCAAGGAGGTCAAAGACATCAAGAAAGAAATTAAGGATGTCAGC  
GACAGATTTTCAAGGTACAAGATTGACGACTCCTCCTCCTCTATGCCGGCAAAAGACAAGG  
TCGACCCTCGACTTCGTGCAGTCTACAAAGACGCCGCAGAGCTCGTCGGAATTGATGGAC  
CAAAGGATGAACTTGTCAGTGGCTGAATGAGAAAGAAGGCCAATCACTGAAATCTGTCTC  
TATTGTTGGATATGGAGGGTTGGGCAAGACCACGCTCGCCAACCAGATCCGGGTCAACCT  
TGGAGCGACCTTCGACTGCGGGG

**TmMla\_1\_675\_JF261156.1\_Jordan\_2011**

ATGGATATTGTCACGGGTGCCATTGCCAAGCTGATCCCCAAGCTGGGAGAACTGCTTGTG  
GGGGAGTACAAGCTACACAAGGGCATCAAGAAAAATATCGAGGACCTCCTGAAAGAGCTC  
AACACCATGAACGCTGCGCTCATCAAGATTGGTGAGGTGCCGCCGGACCAGCTCGACAGC  
CAAGACAAGCTTTGGGCCGATGAGGTCAGAGAGCTCTCCTACGTCATTGAGGATGTGGTG  
GACAAGTTCCTTGTACGGGTCCATGGCATTGAGCCCGACGACAACACCAACGGATTCAAG  
GGGCTCATCAAGAGGACCACCAAGTTGTTGAAGAAAGTCGTGGATAAGCATGGGATAGCT  
CACGCGATCAAGGACATCAAGAAGGAACTCCAGGAGGTGGCTGCTAGGCGTGACAGGAA  
CAAGTTCGATGGTATTGCTTCTGTTCTACTGAAGCAATCGATCCTCGTCTCCGTGCTCTGT  
ACATAGAAGCGGCAGAGCTAGTTGGCATCTATGGGAAGAGGGATAAGGAGCTCATGAGTT  
TGCTCTCCTTGGAGGGCGATGATGCCTCTACCAAGAACTGAAGAAGGTCTCCATTGTTGG  
ATTTGGAGGGTTGGGCAAGACCACTCTTGCCAGAGCAGTATACGAGAAGATTAAAGGTGAT  
TTTGGTTGTCAC

**Pbr1.c\_1\_663\_MH595619.1\_Carter\_2018**

ATGGTGAGCGCCTTGGCAGGGGTGATGACCTCTGTCATCGGCAAGCTCACCGCCCTGCTC  
GGGGAGGAGTACGCAAAGCTGAAAGGTGTGCACAGGGAGGTGGAGTTCATGAAAGATGA  
GCTGAGCAGCATGAACGCGCTCCTTCAGAGGCTGGCAGAGGCGGACCGTGATCTTGATGT  
GCAGACGAAGGAATGGAGGGACCAAGTTCGGGAGATGTCTTACGACATTGAGGATTGCAT  
GGACGACTTTATGAAAAGCCTTGGCCAACTGACAGTGCTCAGACAGCAGGGCTTGTGCA  
AAGTGTGGTCCAGCAGCTCAAGGCGCTGAGGGCGCGCCATCAAATATCCAGCAAAATCCA  
GGGGCTCAAGGCACGTGTTGAAGATGCAAGCAAGCGACGTATGAGGTATAAGCTTGATGA  
GCGCACCTTCGAGCCTAGCATCTCAAGGGCTATCAACCCTCGTTTGCCTTCACTCTATGCT  
GAGCCTGATGGGCTTGTCCGTATTGACAAGCCAAGAGACGAGCTCATTAAAGTGCCTAATG  
GAGGGGATGGGTGCATCAGTGCAGCAGCAAAAGGTGTTATCTATTGTGGGTCTGGGGGT  
CTCGGTAAAACTACACTTGCCAATGAGGTGTACCGTAACTGGAAGGCCAGTTCCAGTGTC  
GA

**Pm3A\_1\_696\_AY939880.1\_Srichumpa\_2005**

ATGGCAGAGCGGGTGGTCACCATGGCGATCGGGCCACTGGTGTCCATGCTGAAGGACAA  
GGCGTCCAGCTACCTCCTGGACCAGTACAAGGTCATGGAGGGAATGGAGGAGCAGCACA  
AGATTCTCAAACGCAAGCTTCCGGCCATCCTCGACGTCATCACCGATGTTCGAGGAGCAGG  
CCATGGCACAGAGAGAAGGTGCCAAAGCCTGGCTTCAGGAGCTCAGGACAGTCGCCTATG  
TGGCAAATGAAGTCTTCGACGAATTCAAGTACGAAGCCCTACGCCGTGAAGCCAAGAAGA  
ATGGGCACTACATAAAGCTCGGCTTCGATGTAATTAACTCTTCCCTACTCACAACCGTGTT  
GCGTTCCGTTACAAAATGGGTGCGAAGCTTTGCCTGATTCTGCAAGCCGTTGAGGTCCTCA  
TAGCAGAGATGCAGGTCTTTGGGTTCAAGTACCAACCACAGCCACCGGTGTCCAAAGAGT  
GGAGGCATACAGATTATGTTAGCATTGACCCACAAGAAATTGCCAGCAGATCCAGACACGA  
AGATAAGAAGAACATTATTGGTATACTAGTTGATGAAGCTAGCAATGCAGATCTCACAGTTG  
TTCCTGTGGTTGCAATGGGGGGCCTTGGCAAGACCACATTAGCGCAACTCATATACAATGA  
TCCTGAAATTCAGAAGCATTTCAGTTGCTG

**Zar1\_1\_645\_NM\_114955.4\_Salanoubat\_2000**

ATGGTGGACGCTGTTGTAACAGTGTTTTTAGAGAAAACCTTGAACATCCTCGAAGAAAAAG  
GCCGAACCGTATCGGACTACCGAAAACAGTTGGAAGATTTGCAAAGCGAATTGAAATATAT  
GCAGTCTTTTCTCAAGGATGCAGAGAGGCAGAAGAGAACTAATGAAACGTTGCGTACTCTT  
GTTGCGGATTTACGAGAACTGGTTTACGAAGCTGAGGATATACTTGTGGATTGTCAGCTCG  
CGGATGGTGATGATGGGAACGAGCAAAGGTCATCAAATGCGTGGCTTTGCGCGGCTTCATC  
CTGCCCCGGGTTCCGTTGCAGTACAAGAAAAGCAAACGTTTGCAAGAGATCAATGAGAGGA  
TAACGAAAATAAAGAGTCAAGTAGAGCCTTATTTGCAATTCATAACGCCGAGTAATGTTGGA  
AGAGATAATGGAAGTATCGGTGGAGCTCTCCGGTGTATGATCATACTCAGGTGGTTGGTT  
TGGAAGGAGATAAAAGAAAAATCAAGGAGTGGCTCTTTGATCAAACGACAGCCAGCTTTT  
GATAATGGCCTTTGTTGGGATGGGAGGGCTAGGTAAACTACAATCGCTCAAGAAGTGTTG  
AATGACAAAGAGATCGAACATCGTTTCGAAAGAAGG

**PREY SEQUENCES**

**Kinesin protein (HORVU.MOREX.r2.1HG0038710)**

GTTAAGATGCTTGCTGGGGAGATTGCGTTTGGTACCAGTTCACTGAAAAGACTAATTGAGC  
AATCCATAGAAGACCCTGAAGGGACAAAAAATCAAATAGAGAATTTAGAGCATGAAATCCA  
GCAAAAGAGGAGGCATCTGCGAGCCCTGGAACAAAAAATCATGGAAAGTGGTGAGGCATC  
AGTTGCTAATGCTTCTATGGTGGATATGCAGCAGACTATTACAAAGTTGACAGCTCAATGCA  
ATGAGAGGGCTTTTGACTIONAGAGTTAAATCAGCAGATAATCGTGTCTTCAGGAGCAGCT  
ACAACAGAAGAGTATGGAAATCAATGATTTACAAGAAAAAGTTCTGCGCCTTGAGGCACAG  
GTCATACCAAAAACCAACATATCACCTGAACAATGCACACAGCAGGAGATTCTTGATTTGAA  
AGCTAAACTTCAGTCCAAGGAAGTTGAAAGTGAGAAGCATAGATACCAGCATCTGGAAATG  
ATTGACGAAAATCGAGACCTAATCAATCAGAACCATAAATTAAGTGAGGAAGCTGCTTATGC  
AAAAGAATTGGCATCTTCTGCAGCTGTCGAGCTTAAGAATTTGGCTGAAGAAGTTACAAAG  
CTATCCATACAAAATGCAAGGCAGGCAAAGGAGTTATTAATTGCTCAGGAGATGGCACATT  
CCAGGGTTCCTGTTAGAAAGGGGCGTCCAGCAGGTAGTAGGGGCAGGGATGAGGTTGGG  
ACCTGGAGTCTTGATTTAGAGGATATGAAGATGGAGCTGCTGGCGCGAAAAAAGAGGGAA

GCTGCTCTAGAAGCAGCTTTGGTAGAGAAGGAGCTTCTTGAAGAGGAGTACAAGAAGAAG  
TTTGATGAAGCAAAGAAAAAAGAGCTTTCTCTAGAAAATGATCTAGCAGGCATGTGGGTTCT  
TGTTGCTAAGTTGAAGAGAGGGGCTTTCAGCATATCTGATTTAAATGTTGATGACCGGTCTA  
TCAATCTAACTGACATAACTAATGATATAAAGGAAAAACAAAGGTGATACAAATGTAGCTCTA  
GTTGAGAAACAAGTGCCAGATGATACTTTGAAGTCATTGACCGCAGAAGAATGTAGAAGTC  
CAGAAATTTGAACCTCTTCTTGTTCTCAAGGCTAAAATTCAGGAGATGAAGGAGAAGGA  
AACTGATCCCCTGAGTGATAAAGATGTCAATTCCCATGTCTGCAAAGTATGTTTTGAATCCG  
CAACTGCTGCAGTTTTTGCTTCCTTGTCGGCATTGCTTGCAAGCCTTGCGCACTTGC  
CTGTTCCGAATGCCCTCTGTGCCGCACACGAATCGTAGACAGGATAATTACCTTCACGTAG  
ATCACTTGTTAGCCTAAGGAACTTTTGACGCACCCAATCTCTCCCTGTAAAATCACCAACC  
GTATATGTTCTTTTTCTCTGTAGCAAAGAAGGTTACTTTTATGTTCTTCTATGTTGTATTG  
CCATTCGTTTGATTTCCCTATATAGCTTTACCTTGGCTCCTTGTTGTATTGAGAAGTTCAGC  
GACTTCTCAACAAATGTGTATAGATATGTGACTCAACATTGTCCTCAGAAGTAAAGCAAATT  
GATGTGGCAATACTTTTTTTTTCTTCTCTTTCAGAAGTAAAGGATGAACATGAGATCCTGAA  
ACTGATGCAGCGAAAAA

**POLAR-like domain protein (HORVU.MOREX.r2.7HG0616280)**

GGGATTTCAAAGGCCAGCACGCCATGGCGACGGCCAACGCCGGCGGCGAAGACGACGTG  
CCGGGAGACCGCAACCCCGATTCCGCCGCGTCGAGCTGCCTCACGGACGGGAACGAGCC  
GCGGGCCGCGACCGGCCGGTGTGAGGACCATCGTCGTCGTCATCATCATCAGGTGCGCG  
AGATGGAGGCGGCGAGCCGCAGGAGGATGGACGTGCTGGAGGAGGAGTTCCACGCCGA  
GCTCGAGCGCGTTGCGGCCGGCTACGGCCAGGACACGCCGCCGTTCTCGATTGGAGAGG  
AG

**Dynamin-related protein 3A (HORVU.MOREX.r2.3HG0259240)**

CCAAGTTTCATCGGTGGCAGCAAGGCTGTAGAGCAAGCACAGCAACAAGTTAGAGCAGCT  
AGATTGCCTGCAACAGTGGTTAGAAGGGATGGAGTAGATGCAGATAGGCCACAGGCTTCT  
GAAAAAACCCAAAAAGCACGTGCATTATTGGGTAGAACTACTGGTGTAATGGAGTTATCA  
CCGACCAGATCCAGCAGGGGGTACGATCGGCTGCTGAGGCAGAGAGACCAGGATCTTCA  
GGTAGTGGAAGCACTTCGTTTTGGGGCTCAATATTCACCTCAAGCGAAGACCGTGACCTT  
CTTCAGCAAGAGGTAGCTCAACGAACAAATCTTATGCTTCAGCTACTCCCAACCTGGAACA  
TTCATTCTCTTCAATACAGTTAAAAGAGCCACCGCTAGTCCTCAAGCCTTCAGAAAATCATT  
CTGAGCAGGAGGATCTTGAAATAGCAATCACAAAATTGCTGCTGCAGTCATATTACAATATA  
GTAAGGAAAAATGTCGAGGATTTTGTACCAAAGCAATTATGCATTTTCTGGTTAATCACAC  
GAAAAGGGAGCTGCATAATTCCTCATAACTACCCTTTATAGAGAGGAGCTCTTTGGGGAC  
ATTCTCAGAGAACCTGATGAAATAACTACAAAGAGGAGGCAGATACGTGATACCCTTAAGG  
TCCTTCAGCAAGCCTACAAAACCTTTGGACGAGATACCGCTTGAAGCGGAGACAGTGGAGA  
GAGGCTATTCCCTGGATTCTGATGCGACGGGTCTACCACGTGTCCATGGGGTTTACGATG  
GAAGTTCACCATATTGACCCCGAAGCAAACAAGGCCTAGGAAATCAAGCCACTCCGGGG  
AGCAGCAACAACCTTTCAGTGGCAATGGATTCTGATATTACCTTTACGATCATCCCTGG  
ATTAGTAGTGATTTGAGCCAGCGGATGTGCTGGTAGCAACACATGATTCCGCCTTGGGTTT  
GTCAGTTCGGTACCCAATAGATATATGTTTTTTTTCTCTAGCCATTGCTATTCTTTTTAGTGT  
TGCGCCCAACGAAAGCATTGGCGTGGTGCCAAATTTTTGCCATGTTGCCCTCCTGTACAGT

ATATCACTGCCCAATCATTTTCTGACTTAAAATGAAACCGGTGATGGGTATAGTTTCCTTTTTT  
GTTAAAAACCCAGGAAGAAGCCATGGGAACCTTTAGTTTTAGTGCCGAGTACTTGTATCTG  
AACACGGTTAGTTTTGCCGTGATAAGTATGACATGGTTCGTGTAAAAA

**Protein disulfide isomerase (HORVU.MOREX.r2.5HG0402280)**

ACACACGCGTTCGTCTCGTCTCTCGCGAGCAAACCTTAAATCCGCACCACCACGCCCCGGT  
GACGCAGCCGATCGATCGCCACCATCCAGTCCCCCTCCGGCTTCCAGAAGCTTCTCGAC  
GACGCCATGCGTCCGGCCATCCTCGCCGCCCTCCTCCTTCTCCTCGCCGCCGCGGCCCTC  
CCCGGCCGCCGCGCTCTACTCCGCCGGCTCCCCGGTCTCCAGCTCAACCCCAACAACCT  
TCAAGAAGGTGTTGAACGCGAACGGGGTGGTGTGTTGGAGTTCTTCGCGCCGTGGTGC  
GGGCACTGCAAGCAGCTGACGCCGATTTGGGAGAAGGCCGCCGGCGTCTCAAGGGCGT  
CGCCACAGTCGCCGCGCTCGACGCCGACGCGCACAAGGAGCTTGCGCAGCAATATGGAA  
TACGGGGATTCCCAACCATAAAAGTATTTCTCCCTGGCAAGCCGCCAGTGGATTATGAAGG  
AGCAAGAGATGTAAAGCCCATTGTAAATTTTGTCTGTCTCGCAGGTCAAAGGTCTTCTCAGA  
GATAGGTTGGATGGTAAGGCATCAGGAGGTTCAAGTAGCAAAACCTCTGGTGGCTCAAGT  
GAGAAGAAAAACGAACCAAAATGAATCAGTAGAATTGAATTCGAGTAACTTTGACGAACTCG  
TTATCAAAAGCAAGGATCTTTGGATTGTGAGTTCTTTGCACCATGGTGTGGGCACTGCAA  
GAAATTGGCTCCTGAATGGAAAAGGGCTGCAAGAAGTGAAGGGTCAAGTGAACTAGG  
CCATGTTGATTGTGACTCTGATAAGTCCTTGATGAGCAAGTACAAGGTAGAAGGTTTTCCAA  
CTATTTTGGTATTTGGTGCCGATAAGGACAGCCCGTTCCCCTACCAGGGGGCTAGAGCTG  
CTTCTGCTATCGAGTCCTTCGCGTTGGAGCAGCTGGAAGCGAACGCTGCACCACCTGAAG  
TTTCTGAGTTGACTAGCGCAGATGTGATGGAAGAGAAGTGTGCTTCTGCTGCCATTTGCTT  
TGTGTCTTTCTTCCAGACATCCTGGACTCAAAGGCAGAAGGAAGAAACAAGTACCTTGAG  
CTGCTACTATCTGTTGCTGAGAAATTTAAGAAGAGTCCATACAGTTTTGTCTGGGCAGGCG  
CCGGCAAGCAAGCTGATCTGGAGAAGCAGGTTCGAGTCGGTGGCTATGGCTATCCAGCC  
ATGGTCGCTCTCAACGTGAAGAAAGGCGCATACGCTCCGCTCCGTAGCGCCTTCGAGCTC  
GCCGAAATCACCGAGTTTGTGAAGGAGGCAGGGCGCGGCGGAAAGGGCAACCTTTCTCT  
GGAGGGCGCCCCGACGGTGGTCCAGTCGGAACCATGGGACGGCAAGGATGGAGAGGTC  
ATCGAGGAGGACGAGTTCTCGCTCGAGGAGCTCATGGCGGACAGCTCTGCGCCCAACGA  
CGAGTTGTGATTCTCGAACCATGGTAGCGTTTAGAGGAACACTGATGCTTCACTTGTTCTG  
ATGTGTACACTGTACAATTTGGACGGGACACTTTTTGGAATGCCTTTTCTTATCTCAATGTT  
AGCATTGTGGGAGAAAGCTCTGGTGTGCAAGGTGTGGGGGTGTCTTGCCCCCGAAATAA  
AACCAGTTCTGAGCTTAAAAA

**Basic helix-loop-helix (bHLH) transcription factor (HORVU.MOREX.r2.1HG0058670)**

CCAGCGGATGACGCACATCGCCGTCGAGCGCAACCGGCGGCGACAGATGAACGATTACC  
TCAGGGTCCTCAGGTCCCTCATGCCGGGATCCTACGTCCAGAGGGGAGACCAAGCATCAA  
TCATAGGCGGAGCCATAGAGTTCATACGTGAGCTAGAGCAGCT



**WPP domain-associated protein (HORVU.MOREX.r2.3HG0208220)**

GCACCGCGGCAGGAAAGTGGCGTGCCTCCAAATTCCAACCTAGCAAACATGGCAGAGATC  
TTGGATGTGCCAATCAGTGGCACCAATGGAAGTGCCACTGTTCAAGCTGAACAGAGCTTGA  
GTGTGCCACTCAGGGACACCAACGGAAGTGCCAGTGTTACGGTGAAGAGAGCTTGGATG  
TGCCAGTAAGTGATACCAATGGAAGCGCCACTGTTCAAGGATGAACTTCTTCGGAAGGAAA  
TGAGTTAATCATCGTGGATGAGATGGACTCCTTGTGGGATGATGTAAATACCATGGTTGAT  
ATCTCAACATTCGTGACGTACTCTGTCATCAAAGGGTTTGTAAAAGATGCCGAACAAGAAAT  
AGGTCAGCAGCTTGCTTCCAAGGATGAAGAGATAAGGTTGCTGAATCAAAAAGCTGATGCAG  
CTTGGAATGGCAGCCTAAGTTTGTCTGGGGGTCGGGATAGAAAATATGATGAAGTTTATA  
GTATCCGCCAACAGCTTCATGCCATTTCCAAGTCACTCTTGAATTCTGAGTGGGGTCTTTC  
GGGGTCCCAGTATAACTTTGATGGTGCAGATGATGTGAGTAACTTAGAGACAATGAACAT  
TCCTCCAGAAATGGTTCTGCAAAGGTTGAAAGTGCTGGAGCCTCTCCTGATGCGGCTTTTCG  
CTGATGCGTCATGTTTGAAGCACTTGGATAGGGATGCTTTGATAGCCCATTTTAAATAAGAG  
ATGAATACTATGAAAAGGATGCATGATAAAGTCGTGGAATGAAGACAGAAGAGATATTTG  
CACTCAAGCGAAACCTGCTAAACAAAGAAGGATCCAACCCATGGCATTACGGAATAACAA  
AGAATTCGAGCAGATTAGAAAGAAAATTGGGGAAGTTATGACAAGATTGGATGGCCTTCTC  
ATGGAGAATAATAAGAGAACCACTTCTGGCGTCAAGGCAGAAACATTTGCTGGCCAACAAG  
ACAAGAAAAATGTTTTAGATTCTGAAATCCAGCAAATACAAGGTGCTGCCACTAATAATCAA  
GTAGAAGTGTGTGCTTTTCTACACAGGCATCACACATTGCATCCATAGAGGCAGATCATG  
CAAAGAAAATTGGAATGTTAGAGTCTGATATTGAAGAAGCCAGGATGGCAACCATGATTAG  
AGAAGAGATAGAGATGATTGTAAGAGAGTTCGTTAACGAAATAGAAATACGGTTGCAT  
GGTAATGAGATGGAGCATAACATGAAGCAAGACATTTGCTCAGTTATTCAGAAATGAAGCTG  
TAGCAGAAGCAGTGTTAAACCTCAACTCTACATTGTTGAAGTACAATGAGGAAAAGAGCTG  
CTCTGAAGCGGCATCGACTATACAAAAGCAGGAGATTGAGAATCTGAAGCGAGCTGTTGA  
CTCTTTCAGTAAAGTAGTGAGAGAAAAAGAGGAGTGTGAGATTGAATTGGGAGCAATGAAG  
GGTCATATGGATTTATTATCCCATCAACTTGATTTACTTAAAGTCAAAGTGGAAAAGCAAGA  
CTCCTGTATATCTGAAAAGAACAAGGAGTTTGATATGATTGTCGGCAGAGTGGAGCAAGCT  
CTGCAGCATGTACGTCAAATGAGATCAATATGAGCGAGTTCCATGACAGATTTAGAAATG  
CTACAGACTCTCTGAAGGAGGTGGAGAAACAAAATCATTATTTATGTAAAGTCATCGAAGA  
GAAGGAGAAAATATTCACATCAACCATTTATAAAGAAAAGGAGTTCAAAGAACACATGACAA  
GTCTTGTTGAATCCATGAGAGAGTTTGAGAATCTTGTTACAGATCAACAAGCTATCATTGCA  
AACAAAGTTCAGCACAGTGAATCAAGGTTCTGTTTACTGAAAGACCAATGTAAACACCTCAT  
GAAAGAAGGCAATCTTTTGAGAAGGAAGGCATTGCGATACAAGGAGATATCTGAGACAAGA  
GGCTCTAATCTTCAAAGGCTGAGCTCGAGGTGGATTTACTTGGTGATGAGGTTGAGGCCT  
TAACGGATCTTCTTGCAAAAATCTATATTGCGCTCGACCACTATTCTCCAGTTTTGCAACAC  
TATACTGGAGTTATGGAGACCTTGAACATGATCAAGAAACACATAAGCACAGCAAAGTAAA  
ATGCCTTATGCACATTTACATCAGCTGGTGACATGTTAACAGCAGAATTTGGTCTTATTGGC  
CAGAAGGTGCACTTCAGACGATCTGCGGTAACCTTTTTTAGGCGGTTGATGCAGCCCTTGCT  
GTAGAAACCAAGGGCTGTGTAGTGCAGAATAGCTTGTTCCCCTCCGTAGGCAGTAGATTTT  
GCTAGTCTTTGAGCACCTTGCAACTGACCCACCCAAACCATGGCTAGTCCTTCCTTGTCG  
TGTCTCTGAGCTACATTCTGATGTATGGGGTTGTGTACCTGCTGATCTGCAAAAGTGAGA  
CTTGAGTGACCAGTAACAACGGTTGTGGAGTGCTTGTGACCAAATTTTCATTGCGTTTATGT  
AAGAGCTTGACATCTGAATTTGATGTTGTCTCAGTAATCTACAGACTCTGCTGCTTTTTTTTT  
TAATCTTGATATACACGGTGGCATCTAAAAAAAAAAAAAAAAAAAA

**AAA-ATPase 1 (HORVU.MOREX.r2.7HG0598410)**

CATTGCCAGCTTGTGTGAGGGCTTTACTGGGTGACACATCCTAGAACTGTGCAAGCAGGC  
TGCATTCTATCCTATCAGAGAGATTTTGAACAGCGAGAAAGATGGGACAAGAGCAAACAGT  
CCAAGAGCCTTGAGGCAATCGGACCTGGAGAAAGCTCTTTCAACATCTAGAAAGGGAAAG  
AAGGCCGCAAGCGGTGCGGCGTCAGGTTTCCAGTCTCCTGTGTGGACCCGTCCGTGCGA  
TCCTGAAGATGACCAGGTACAGAGCGCAATCT

**Homeobox-leucine zipper protein family (HORVU.MOREX.r2.4HG0338560)**

TCGAAATTGGCATGGGCATTCGTCCTGCTCACTCTATGCTCCAACAGCATGCGCGGGGAG  
AAGCTGGCGTTTCGTGAGAAAGAGAACCTGCTGGCGGCCTACATGGATCACGAGGAGCC  
CGAGCTGGAGGAGGCCGACGAGGAGGAGGAGGAGGAGGAGGAGGAGCGCGCCATGTCGTGC  
GGGCTGGGCGGGAAGAAGCGGCGGCTGGCGCTGGAGCAGGTGCGCGCGCTGGAGCGC  
AGCTTCGAGACGGACAACAAGCTGGACCCGGAGCGCAAGGCCCGCATCGCCCGCGACCT  
CGGCCTGCACCCGCGCCAGGTCGCCGTCTGGTTCCAGAACC GCGCGCCCGCTGGAAGA  
CAAAGCAGCTCGAGCGCGACTTCAACGCCCTCCGCGCCCGCCACGACGCGCTCCGCGCC  
GACTGCGACGCGCTCCGCCGCGACAAGGACGCCCTCGCCGCCGAGATACACGAGCTGAG  
GGAAAAGCTGTGACCAAGCCGGAGACGGCGGTGAAGGCGGAGGCCACCGGCAATGTC  
GAGGCCGCGGAGGAGCGCCTGCAGCAGGCGACGATGGTCGGCGCGGCGGTCTGCAAGG  
ACGGATCCTCGGACAGCGACTCGAGCGCGGTGTTCAACGACGAGGCGTCGCCCTACTCC  
GGCGCGGTCTTCGAGCAGCAGGGATTTCATGGGGTTTCGGCGCGTCGTTCTGGACACGGC  
GTCGGCGGCGCGGCCACACGGGCTGCACGTCCCTGCCCATGCTGGAACCCAAATGGC  
CCAGCGCGTACCCGTACGACGCGAGCAGGTCCAGCGCCTACGGCTTCACGGAGGAATGG  
CTGTCCGGGTTCGGACGCGATTGGCAACGACGGCAGCTCCGCCTTCTTCTCCGAGGAGCA  
CGTCTCCAACCTCAACTTCGGCTGGTGTAGCAGTGGCGCCGAGGGTTTTGACCTCCAGAG  
TACTGTAAAAAGTAAGACGGTGTCAATGTCCATGCAGCGACAGCGGGTACTTACTTTCTA  
CTGGCTAGCTACCTTAGCCTAGCTAGCGGACAAGGAGAGAGGTTAGCAATGGTGGAAATTC  
GATGAGAAGGGTGAATTGCCGGATGAATGGACCTCCTGCCTGCCATTGCCATGGAGGGAG  
GACGTAAATGTTACTACTAGTACACAGTACACAAATAACGGTCTCTAGGTTTAATCGATGGT  
GTAAAAAGTTGCAATCCAAGCATGCAGCCGTCCCGAAAAA

**Ubiquitin system component Cue protein (HORVU.MOREX.r2.7HG0618510)**

TCTGACATGGACGATGCACGGGCCCCGTGCATCAAGAGCTCTGGAAGCCTTGACGAAGTCC  
ATACTGGAGGGTGCAGGAGCTGAAGCAGCGCAGAGCTTGCATCAGGAGAACATGATGCTC  
AAGGAGCAGATGACGGCCGTCCTGTGCGAGAACGCGGTCTGAAGCGCGCGGTGGCAAT  
CCAGCATGAGCGACAGAAGGAGTTCGACGAGCGCAGCCACGAGGTGCAGGGCCTGAAGC  
AGCTCGTCCTGCAGTACCAGGAGCAGCTGAGGACTCTTGAGATCAACAACCTACGCGCTGC  
AGATGCATCTGAAGCAGGCCAGCAGAGCAGCTCCATGCCCGGGCGCTACAACCCGGAC  
GTCTTCTAGTTTGGCTTCAGGCTGATGTTGATGAGCCCTGGCCCTTGGGGATTGAGAGTTG  
AGACTAGTGGTACTCTGCCGTATGATGGTGAAGATGACTAGAAAATGTTGTTGCCTGGGAT  
TCAGACTAGTTGGGTGGATGTTGGTTTGCTGACCACCTGTTGGCCGTGGGATGGGGCGCA  
AGGCTCCCATGTAGATGATATGTTGGTTCAAACCTGTTGCGTTTAAACGTTTTCTGATTTAA  
TATATACACAAAACAATCCAGATTCTTTGCAAAAAA

**Kinetochore protein NDC80 homolog (HORVU.MOREX.r2.5HG0439020)**

CAACTGTCGGCGCCCTCTCGCCTCAAGGCGATGGAGGAGAAGAAGGATGCATTTACTGCC  
GACGTTTCAGAAGTTTGAGGCGGTGGTGGAGAGCTGGTCCACCAAGATCAAGGAGAAGGAA  
GAGGCTTTGCTGGAGAAGGAGAAGGAGCTTGAGGCCAAGGTGTTGAATTGCCAGCAGATC  
ATGGCCGAGAATGAGGAGCTGGTGAACAGGTGGAGGTGCAGGTGGTCAATGTGAGGGA  
CGTCAATAGGATGGCTAGGGAGATGCAAGCGGTGGAAAATGATATTGCCAAGTTGGAGAA  
TATGAATGCCGCACTGGAGGAGAAGGGGTGGGAACTCGAAGCTGCGCTGGTCAGTAAGC  
TTGAGGAGATCGAGGGCCTTGCCGAGCTGTGCAACCAGTCCCTCAGAAAGTTGAAACCCA  
GGATTGATTTCCAGTACGAGGTAAATTCAAAAGGATCCTCCCCGGCTGAGATCCTTGGTAC  
CACCTACAAAACCGCCCTGAAGCCCGCACTCAATGCTCTTCTTAGTGAGACTAACATGCTA  
GTTACCTCAAAGCATGGTGAGTCAGTTGATCTACAAAAGAAGTTGCAAGGAATTGTAAACAT  
GTTGGAGGAGAAAAGGAATCATGTTTCTGTTCTACAGGCTAAACATAACGAGATGACTGCT  
CAGATGGACTCACTGGATCGTGAAATCCAAAGCCATGTTTCACGCTGCGCAACCGATGCTA  
GAAAAATGAAAGACAAGTTTGAGGAAAAAGAACATCACCTGAACACCGTCGAGAAGGAGG  
CAGAGGTCTTTTTAAAGAACTCCGAGGAGGGTCTCCAAGCTGCGTTGAGGGAGACCGACG  
AAGAAACCCAGATGTGCGCCAGGGAGCTGCTCAAGCTCATCGATTCCATCTCGGAGTACA  
AGGAGTTTGTGGAGCTGTTGATTGCCGAGATAGTTGAAGAGCTCCACGAAAGCGCCGAAA  
ACATGGCTTCGCTGTGATCCAAGACTCTGGTGTGAGGTACAGGTTTGAAGCGAGTTGTAT  
TTGGTGCTGCTGCTGTAGAGTTTGTCCGTACGCGAATAGGTACCTTATTGATTGTTTAAC  
GTCGTCTTCGTTGTAGTGTGATAGTTTGAGGGCTTGATTGGAGTTGTAGTCGTGCGCAGGT  
GAGATGAGTTTGGTGTGCGTGTTTCTTGCTGCATTGGCCAGATGAACATGCAGAGTACTCC  
CTTCATTCCCAAATATACAAGTCCTTTTAGAGTTTCCATTAGGGGACTACATACCGAACAAA  
AGCATGTTTATATACATCCGTATATAGATTTTCAATGAAAT

**OBERON 2-like protein (HORVU.MOREX.r2.5HG0370990)**

GGGTTTTGCAACCTTTGCATGTGTGTGATTTGCAACAAGTTTGATTTTGAGGTCAACACATG  
CCGATGGGTTGGGTGCGATTTCTGTTCCCATTTGGACACACACTGACTGTGCGATTCTGTGT  
GGCCAGATTGGGACAGGGCAATCAATTAAGAGCAGCACCGGTCATGCGGAAATGCTTTTT  
AGGTGCCAGGCTTGCCAGAAGACATCAGAATTATTCGTTGGGTAAAGGATGTGTTTCAAC  
AATGTGCTCCTGGTTGGGATAGGGATGCCTTAGTACGAGAGCTTGAGTTTGTGTTGTAAGAT  
ATTTGCTCTAAGCGAAGACCCAAAAGGAAGAAATTTGTTCAAGGAAATGTGCGAATCTGATT  
GAAAGATTGAGGAATAGTTCTCCTGATTCTGTCAATCCTAGGATGATACTGCATGCACTTCG  
AGAGCTTGAGATGGATTCCCTGAAGAGCTCTGAAAATGAAGAATCAGGACGCTTGATCACT  
CCCCAGGAGGCATGTAATCGTATTGCAGAGGTAGTCCAAGAAGCTGTCAGAAAGATGGAG  
CTTGTTGCTGAAGAGAAAATGGGACTGTACAAAAGGCTCGCACCGCCGTGGAGGCCTGT  
GACCGTGAGCTTGATGAGAAGGCCAGACAAGTTCAGGAGTTCAAGGCCGAGAGGCTGCG  
GAAGAAGCAGCAGGTGGAGGAGCTCGAAAGCATTGTTGCGTTGAAACAGGCCGAGAGCCG  
AGATGTTCCAGCTCAAAGCAAGCGAGGCCCCGCCAGGAGGCTGAGAGGCTCCAGAGCATC  
GCGCTTGCCAAATCTGAGAGGGCTGAGCAGGACTATGCTAGCCTCTACCTCAAGCGGCGC  
CTGGAGGAAGCGGAGGCAGAGAAGCAGTTTCTTTTCGAGAAAATAAAGCTTCAGGACGGC  
CATAGGCCCCCGCAGGCGAGCAGCAGCGTGCTGGTGATTCTCTCAGGCGCCCTCTCA  
GGCGTTGATGCTGTCCAAAATTCAGGACCTTCTCAAGAACGTTGCTACCATGCCGACAAAG  
TCGGAGGCGCATTCAAATAAGAGCAGCAGTGCTCATCAGGTTTGGGATTACATGTTTGTG  
TTATTGTGCTAATGTATGGTGACTTAAGTGTGATGTGTTAGGAGTATAATGGGCGGTGCTC

CCCCTTGAAAAATCAAATATTAATGTTGTTGGCTATATCGGGATATGATATACTCATGTAGG  
CTACATATTTTAAATTGTTATTACTTTGAGTAAGAGATC

**Golgin 5 (HORVU.MOREX.r2.1HG0071390)**

AGGAGAACGTCTGCAGACAGTAATATGTCATACTATCTGAGGAGCATGACTCCAAGTGCTT  
TTGAATCAGCACTCCGTCAAAAGGATGGAGAATTGGCTTCCTACATGTCACGCTTGGCCTC  
ACTGGAATCTATTCCGAATTCCCTGGCAGAGGAGTTGGTAAAACTGACGGAACAATGTGAA  
AAGTTGCGGAGTGAAGCTGCTGCTCTGCCTGGCCTAAAGGCTGAACTGGAAGCACTGAAA  
CAAAGACACTTTCAAGCTCTGGAAGTTATGGGGGAACGTGATGAAGAGTTGGAAGAGTTAC  
GGAATGATATTGTTGACCTAAAGGACATGTACAGAGAACAAGTGGATCTTCTTGTTAGCCA  
GCTCCAGACATTGGGCGCCCGTGTATAGTGCAATTGACCCAACAAGATAACAGTTTTGAAG  
GCCCCAACATGTTCCGTCAGAGTTGAAAAAAGCAAAACCCGCGGCGAGTGTGGGAAGTTG  
ATAGTCATACGAGGAAGATATATCTTTATTGATTTTGTGTACATCGTGAAGGATCTTTGTTGT  
CGGTCTCGGTAGCATAGCCAGTGTGTTGTACACTAGACTGGATAGCTCCACAGCTCTACAT  
TCATTGATGACTTGCATGCAAAGTTTTTCGTTACAGAAAGAGAAGTGTGTCATCGTCTCAGC  
TAATAAATACTACTCCCTCCGTTTCTAAAAAA

**PI 4-kinase alpha (HORVU.MOREX.r2.5HG0404360)**

GGCGGAGGCGTAGTCTACACGGCCGTGCCGTTCTACAAGAGAGCCAGGCAGCTCGAAGA  
CAAGGCGATCGAAAACGTGGAACTGCTTTGGACGTTTTGGAGCGTGCCTCTGAGGTGAC  
GGAGAAGTTTGCTGCTAATGTTGCCAATTCCCTACCGAAGGATGGATCCCTGCACAAGTTG  
GCTGAGGAGCTTGAGTACATTGCTGAGGAAGTCGATAAGGATGCACACAAGGCTGAAGTC  
ATGATTAAGAAGATCGAAGCGCTCAGCGACAAGATTGACGCCGCGGTGGAGCCTGTCATT  
AAAGAGCTCGAGGAGGAGTTCAAGCCAAAGCCAGCATCCCACTCTGGGTGAGACGCCAG  
AAATGACCGTTACATAAACTGTGGGAGAACGCTCCCCAAAGTGTCGCTGTTGTACATAT  
ATGTTGCTGGTTTTCTTTCTTTCTTTTGAAGTGCCAACTTGTAATATGTTGTTGTGCCCT  
ATGAACTAGAAGGACCCCATGGTTACAGTAAGAAATGGTGATCGTGTGCTGGGTGCCCGG  
ATCTGAAGCACCTGTAATCCTGATAATGTTACAGTAAGAACTGCATCTGAAGAATGGAT  
ATGTATGTGCGTGCATCAACTCCGCCCTAAAAAAAAAAAAAAAAAAAAAAAAAAAA

**Pentatricopeptide repeat 336 (HORVU6Hr1G017930/ HORVU.MOREX.r2.3HG0255360)**

TCGACGACGATGTGGCGTTCCCGAGCTCGCGCTCTCCTCCTACTCCGCTCATCCGTCCCC  
AGGTGCGCCACCGCCGCGCCGCAAAATCCACTTCGGAGCTTGACCCGAGCCCCGCCCCCGCC  
ACCACGCCTTCTCTCCCGCTTCCTCTCCTCCTCCTCCCCGGAGGCCCTGCCGGACGCCCC  
CTCCTCTTTTGCGGATGCCCTCCAGGATGATCCCTTTGCCTTGGCGCCCGGCGTTGAACC  
CGGATCGGCTGATCCCACTGAGGCCGACGAGGACAACCTGGCCGCGCTCTGGGAGCAGG  
ATGCGGGCGACGCCAACGACATCTTCGTCTCCCCCGCCTCCCCGACACCGCTGACTCAG  
AGGCCAGCGACCAGGAGGTGCCCCGCGTCCGCGCCGTCGTCCAGTCCACCCCGGAGGA  
CCAGATCCCCTCCGCCATCGCCGACATGGTCGTTGACTTCACCGAGCCGCTCCTAGCCGC  
CATCCTCCTCTCCGCCGAAGTCTGCAAGGTTGCTGATTCGGCCGAGATTGACAAGAT  
GGACGCTTACATGCTCTGGGATTTGGTGAAGGAAATGGGCAGTGTGCCTGGATCATTGAG  
CACCCCACTGTTGAACAGAGTGCTAGCAATGTTCTGGAAGCTTCAGAAATCGAAGGCGGC  
GCTGGAGGTGCTTGACAAGTTCAGTGAGTTTGGCTGCACTCCGGACGGTGACAGCTATTA  
TCTGGCGATTCAAGCGGCTGGAAAGAAGTCCATGGTTGGCGCCGCATGGGGAGTTTGCGA

GAAGATGATTAGCTCTGGGTGCTTCCCTGATGGGAAGAAGACTGGTGAGATTGTGACCTTC  
TTTTGCCAGGGGAAGATGGTGACGGAGGCGCATTAGTATACCTAGCAGCAAAGGAGAAG  
AAGGTTTCAGATTCCAACATCAGCCTTGGACTTCCTTGTTGGTGCTTTGGCGAAGAATGATG  
CGACCATCACTACGGCTCTGGAGCTGCTTGGGGAATACAAAGGAGACTCTCTTAAGCATG  
CGGGCAAGTCCTTTGCTGCTGTTATACATAGTTTGTGCAGGATGAAGAATGTGAATGATGC  
AAAGAAGCTGTTGATGAGGATGGTGAATCTTGGCCCAGCTCCTGGTAGTGCAGTGTTCAAC  
TTTGTTCATCACAGGATTGTCTAAAGAGGGAGAAATGGAAGACGCAAAGGATTTGATAAGAG  
TGATGGAGAGCCGAGGGGCTGCGCCCTGATGTTTATACATACAGTGTGATAATGAGTGGCT  
ATGCAAAGGGAGGCATGATTGATGAAGCCCATTCTCTACTTCGCGAAGCTAAGAAGATCCA  
TCCAAAACCAAGCAGGGTTACTTATCACATTCTAATCCGTGGTTACTGCAAGATGGAGGAG  
TTTGAGAAGGCCCTGGAGTGCCTAAAGGAGATGAAGGAGGATGGGTTGCAGCCAAACATG  
GATGAGTATAACAACTCATCCAGTCGTTATGTCTGAAGGCTATGGACTGGAGGACAGCTG  
AGAAGCTCCTTGAGGAAATGGAGGGCAGTGGGTTATGCCTTAAGGGCATTACCCGCAGCC  
TCATAGCAGCAGTCAAGGAGTTGGAATGGAAGAGGCGTCAAAAGACAGCCAAGAAGCAT  
AGTTTCTCTAGGATACGCTTGAAGTGACACAGCCACTAATCAGTTTTGCGGATCACCTCTT  
TTTGCTCTCTGCATCTCTGGTGAGGTTATGAAAAACACCATCTTTTGTACTTGCTGCTTGTT  
GTTAGATGCTAAAATAATATTGCATTTGTATTATAAATGCTGGACCTGAACGGATGCATATTT  
AATTTTGGTCTAAAAAAAAAAAAA

**Polyamine factor 1-binding protein (HORVU.MOREX.r2.7HG0598540)**

ACAAGAGAAAGCAAAGGCGAAGACGGGGAGCAGAAAACCTCCAGCCCGACGGAGGCCATC  
CGGTTCCCGCCGGGCCCGCTCCTCCTCCTCCCCCTCGCCGGCGCTCCAAAGAGGTCCCA  
TGGAGGAGGACGGCCCTAGCCGGAGCGGCCTGCCGCCGGTCCGGGGAGTGCGAATGGAG  
GGAGGAGCTGAGGCAGCAGCAGTCCCAGGTGGAGGCGCTGCACGACCGGCTCGTGGAG  
GTCAAGGTCGGGATGCGGCGCTCCGAGGACGATTCCGGCCGGGAGCTCGAGCACCTGTG  
CCGCAGGGTCAAGACCATCGCCACCCTGCTGGCGTACCTCAAATCCAAGGCCAGGATCAT  
GTCGATTCCGCACCTCGCGCACACGTCTGCGGGATCAGGAACCAGGATGGCGTGGGGT  
TCGTGACCGGCACGGGGTGCCCCCTGGCCGATTGGTCCAAGGCCCGCCGAGCCCGCTTCC  
TGTGGGGGAGGTTCCGGATGACAGGGCGGCGACAGAGGGTAGCGGCGTTCTGAAAAATGG  
CGATGCCGTTGAAGGGGATGGAGATGTCGATGACATCCTCAAGTCCATCCGCGTGGTGAC  
CGATGTCATGGAGTCTCTTGTCAGAGAGTGATTGTGGCCGAGTCTGAAACTGCTAATGAG  
AAAGAAAAGGTCAGGATTGGGTTGGAAGAGATCAGGAGGAAGACCATACAGGTTCGAGTCC  
ATGTCCGTCAAAGTCGAGGAGATGGAGAAATTTGCAGTGGGTACGAACGGCATGCTGAAT  
GAGATGAGGCAGCGGGTTGAAGATATGGTCCTAGAGACCACTCGGCAGAGGCAGCGCGC  
TGCTGAAAATGAGCAGGAGCTCAGCCGTGTGAAGAATGACTTTGAGTCGCTCAGAACTTAT  
GTCAGCACACTCGTTAGTGTGAGAGAAACCCTTCTTTCATCGGAGAAGCAATTCGAGACAA  
TGGAGAAGCTTTTTGACAGGCTAGTCGCAAGGACCAACCAGCTCGAGACTGAGAAAGCAC  
AGAAAGAAGCAGAAGTCCAGAAGGTCATGGAGGAAAATGTGAGGCTACGTGCCATGGTCG  
ACAAGAAGGACGCACAGCTCCAGGCGATGAGCGAGCAGTGCAAGTTCATGGCTCTGAACC  
GTCCAAACTAGCGGAAGGCGGACACACCAGATAAGAAACCTGGAGTTGCCCAACTGATGT  
CACTTACAGACTGCCGCAGCAGTGAAAAGAAAAAGAAGTTATATCCCTCGGGGCCCGAA  
TAACCGACGATGAAGCCATGTTCTTGGGTCCGTGATTTCGTGGTGCAAACCCAATCGTGAAC  
TGTCGTTACCTTAGATGTGGTGTGTCGAAATTGCAACCATGACTGTTGTATCTTGATTGTGT  
GTGTAAAGACTGGGCGCATTTGCCCGGTTTTCGTAAATCATACAGATGTATACCGCAGGTC

CATTCATCCTTCTTCTGCCTGAACCATATAGTTCAGCTGCTGCGTGCGTGCTGTTTTTTTTTAG  
CCGTAACTGTGGTGCTGTAAAAATAACTGAAATGTTTTGCTTATAGATAGACTGGTTATAT  
TTGCATCAATTTTCT
